# Supplementary material for: Chromothripsis in Human Breast Cancer
Source: Oxford University Press journal article supplement (doi:10.1158/0008-5472.can-20-1920), 2020-09-24
Supplement: 00085472can201920-sup-244800_2_supp_6563060_qgn2gt.xlsx [file 00085472can201920-sup-244800_2_supp_6563060_qgn2gt.xlsx]

## Sheet: CATCH cohort
Case ID	Chromothripsis status (High confidence, Intermediate confidence, Low confidence, Negative)	Chromothipsis scoring based on WGSeq	RNAseq (Yes/No)	Breast cancer subtype	Geneticist evaluation of germline variants (Yes/No)	Ploidy
K26K-GP1DEZ	HC+	Y	Y	ER_minus_HER2_minus	Y	2
K26K-2HQFG6	HC+	Y	Y	ER_minus_HER2_minus	Y	2
K26K-6GJXKU	HC+	Y	N	NA	Y	2
K26K-GQ6XGU	HC+	Y	N	NA	Y	4
K26K-372K7Q	HC+	Y	Y	ER_minus_HER2_minus	Y	2
K26K-7K2ESR	HC+	Y	Y	ER_plus_HER2_minus	Y	6
K26K-EUWQV4	HC+	Y	Y	ER_plus_HER2_minus	Y	2
K26K-KBMSKG	HC+	Y	Y	ER_minus_HER2_minus	Y	2
K26K-PAZNZP	HC+	Y	Y	ER_plus_HER2_minus	Y	2
K26K-YYMX7V	HC+	Y	Y	ER_plus_HER2_minus	Y	2
K26K-3Y6UFG	HC+	Y	Y	ER_plus_HER2_minus	Y	4
K26K-53KLXE	HC+	Y	Y	NA	Y	4
K26K-8REHR3	HC+	Y	Y	NA	Y	4
K26K-96DFP9	HC+	Y	N	NA	Y	2
K26K-JG8K8P	HC+	Y	Y	ER_minus_HER2_minus	Y	3
K26K-PPGH4E	HC+	Y	Y	ER_plus_HER2_minus	Y	2
K26K-NKAGPR	HC+	Y	Y	ER_plus_HER2_plus	Y	2
K26K-TG5T5N	HC+	Y	Y	NA	Y	2
K26K-NRBK1M	HC+	Y	N	NA	Y	4
K26K-11UKEH	HC+	Y	Y	ER_plus_HER2_minus	Y	2
K26K-1ER5BG	HC+	Y	Y	NA	Y	4
K26K-1GUTR3	HC+	Y	Y	ER_plus_HER2_minus	Y	4
K26K-1YV1NR	HC+	Y	Y	ER_plus_HER2_minus	Y	3
K26K-2LSYUD	HC+	Y	Y	ER_plus_HER2_minus	Y	3
K26K-38J27P	HC+	Y	Y	ER_minus_HER2_minus	Y	4
K26K-3J6HU5	HC+	Y	Y	ER_plus_HER2_minus	Y	4
K26K-3SV5GJ	HC+	Y	Y	NA	Y	4
K26K-49T9ZE	HC+	Y	Y	ER_minus_HER2_minus	Y	3
K26K-4PEUSL	HC+	Y	Y	ER_plus_HER2_minus	Y	2
K26K-54UFHM	HC+	Y	Y	NA	Y	2
K26K-5JM4B6	HC+	Y	N	NA	Y	2
K26K-5NNPD2	HC+	Y	Y	ER_plus_HER2_minus	Y	3
K26K-6DAZ5U	HC+	Y	Y	ER_minus_HER2_minus	Y	3
K26K-6TUAKJ	HC+	Y	Y	NA	Y	2
K26K-8SNWXL	HC+	Y	Y	ER_plus_HER2_minus	Y	4
K26K-9G8979	HC+	Y	Y	ER_plus_HER2_minus	Y	2
K26K-B3P4PS	HC+	Y	Y	NA	Y	2
K26K-BQAVRQ	HC+	Y	Y	ER_plus_HER2_plus	Y	4
K26K-BRET3U	HC+	Y	Y	ER_plus_HER2_plus	Y	3
K26K-C6D9GA	HC+	Y	Y	ER_minus_HER2_minus	Y	4
K26K-CLCZYM	HC+	Y	Y	ER_plus_HER2_minus	Y	3
K26K-DDJVUJ	HC+	Y	Y	ER_plus_HER2_minus	Y	5
K26K-DMU6TK	HC+	Y	N	NA	Y	2
K26K-ELSESF	HC+	Y	Y	ER_plus_HER2_minus	Y	3
K26K-EVQJ85	HC+	Y	Y	ER_plus_HER2_minus	Y	3
K26K-F7Z1YC	HC+	Y	N	NA	Y	6
K26K-G1K1C8	HC+	Y	Y	HER2	Y	4
K26K-G7RGRH	HC+	Y	Y	ER_plus_HER2_minus	Y	6
K26K-GGT9WV	HC+	Y	Y	ER_plus_HER2_minus	Y	2
K26K-GR7U4J	HC+	Y	Y	ER_minus_HER2_minus	Y	2
K26K-HGXQVM	HC+	Y	Y	NA	Y	3
K26K-HKH6GS	HC+	Y	Y	ER_minus_HER2_minus	Y	2
K26K-JF2LWZ	HC+	Y	Y	ER_plus_HER2_minus	Y	2
K26K-JMFZN8	HC+	Y	Y	ER_minus_HER2_minus	Y	4
K26K-KQYMSV	HC+	Y	Y	HER2	Y	2
K26K-LHW5P8	HC+	Y	Y	ER_plus_HER2_minus	Y	2
K26K-LKKMR2	HC+	Y	Y	NA	Y	5
K26K-LUMBC5	HC+	Y	Y	ER_plus_HER2_minus	Y	2
K26K-MNVK2W	HC+	Y	Y	NA	Y	2
K26K-N2D9XV	HC+	Y	Y	NA	Y	6
K26K-N422KN	HC+	Y	Y	NA	Y	2
K26K-PCA7BN	HC+	Y	Y	ER_minus_HER2_minus	Y	2
K26K-PDJUSD	HC+	Y	Y	HER2	Y	3
K26K-QA7GAW	HC+	Y	Y	NA	Y	3
K26K-QSDNXA	HC+	Y	Y	ER_plus_HER2_minus	Y	2
K26K-R4ATRT	HC+	Y	Y	HER2	Y	4
K26K-RWBB37	HC+	Y	Y	ER_plus_HER2_minus	Y	2
K26K-SAA77Y	HC+	Y	Y	ER_minus_HER2_minus	N	2
K26K-SJGG4M	HC+	Y	N	NA	Y	2
K26K-SSBAF2	HC+	Y	Y	ER_plus_HER2_minus	Y	2
K26K-SU166F	HC+	Y	Y	NA	Y	4
K26K-TL7317	HC+	Y	Y	ER_plus_HER2_minus	Y	3
K26K-U48257	HC+	Y	Y	ER_plus_HER2_minus	Y	3
K26K-UVAXJ4	HC+	Y	Y	ER_plus_HER2_minus	Y	2
K26K-V2PF6M	HC+	Y	Y	ER_plus_HER2_minus	Y	3
K26K-V3TLD6	HC+	Y	Y	ER_plus_HER2_minus	Y	2
K26K-WHAFAB	HC+	Y	Y	ER_plus_HER2_minus	Y	4
K26K-WPZ6MB	HC+	Y	Y	NA	Y	2
K26K-XAEMKV	HC+	Y	N	NA	Y	2
K26K-XBX9RY	HC+	Y	Y	HER2	Y	3
K26K-XS277Z	HC+	Y	N	NA	Y	2
K26K-Y89LSN	HC+	Y	Y	ER_minus_HER2_minus	Y	5
K26K-YB2V81	HC+	Y	Y	ER_plus_HER2_minus	Y	6
K26K-YJB543	HC+	Y	Y	NA	Y	2
K26K-Z559NG	HC+	Y	Y	ER_plus_HER2_minus	Y	3
K26K-Z8Z4HX	HC+	Y	Y	ER_minus_HER2_minus	Y	2
K26K-HH4Q3M	MC+	Y	Y	NA	Y	6
K26K-G4S7NK	MC+	Y	N	NA	Y	2
K26K-4AUP7Y	MC+	Y	Y	ER_plus_HER2_minus	Y	3
K26K-EVVHM1	MC+	Y	Y	ER_minus_HER2_minus	Y	2
K26K-59LEYZ	MC+	Y	Y	ER_minus_HER2_minus	Y	2
K26K-6FAWPW	MC+	Y	Y	ER_minus_HER2_minus	Y	3
K26K-7UH38T	MC+	Y	Y	ER_plus_HER2_minus	Y	2
K26K-92LDBN	MC+	Y	Y	ER_minus_HER2_minus	Y	2
K26K-F4BWZA	MC+	Y	Y	ER_minus_HER2_minus	Y	2
K26K-NDDF92	MC+	Y	Y	HER2	Y	3
K26K-P8EEDV	MC+	Y	Y	NA	Y	3
K26K-R8KRU9	MC+	Y	Y	NA	Y	4
K26K-U13K48	MC+	Y	Y	ER_minus_HER2_minus	Y	4
K26K-VAHD5J	MC+	Y	Y	ER_minus_HER2_minus	Y	2
K26K-Y8ATLQ	MC+	Y	Y	ER_plus_HER2_minus	Y	2
K26K-ZUWXZY	MC+	Y	N	NA	Y	2
K26K-KAN58L	LC+	Y	Y	ER_plus_HER2_minus	Y	2
K26K-1YXDJQ	LC+	Y	Y	NA	Y	2
K26K-4RJ5UK	LC+	Y	Y	ER_minus_HER2_minus	Y	2
K26K-6PJ115	LC+	Y	Y	NA	Y	2
K26K-89CAXB	LC+	Y	Y	ER_plus_HER2_minus	Y	4
K26K-QXX4LD	LC+	Y	Y	NA	Y	3
K26K-XEKNVJ	LC+	Y	Y	ER_plus_HER2_minus	Y	2
K26K-Y9BDCK	LC+	Y	Y	ER_plus_HER2_minus	Y	3
K26K-YU91XW	LC+	Y	Y	ER_plus_HER2_minus	Y	3
K26K-Z3LWUS	LC+	Y	Y	ER_plus_HER2_minus	Y	2
K26K-ZDRXB2	LC+	Y	Y	ER_plus_HER2_minus	Y	2
K26K-Q4JZ17	negative	Y	Y	ER_minus_HER2_minus	Y	2
K26K-38JWK8	negative	Y	N	NA	Y	2
K26K-43JZGQ	negative	Y	Y	ER_plus_HER2_minus	Y	6
K26K-UY56QP	negative	Y	Y	ER_plus_HER2_minus	Y	2
K26K-ZFF7VY	negative	Y	N	NA	Y	2
K26K-55Y9F3	negative	Y	Y	NA	Y	6
K26K-B8MUBJ	negative	Y	Y	ER_minus_HER2_minus	Y	2
K26K-CAG4DA	negative	Y	N	NA	Y	2
K26K-F5V95D	negative	Y	Y	ER_plus_HER2_minus	Y	2
K26K-H63HRT	negative	Y	N	NA	Y	2
K26K-KDGJQR	negative	Y	Y	ER_plus_HER2_minus	Y	2
K26K-L5XH9B	negative	Y	Y	ER_plus_HER2_minus	Y	6
K26K-TMX9UN	negative	Y	Y	ER_minus_HER2_minus	Y	4
K26K-WLLBUL	negative	Y	Y	ER_plus_HER2_minus	Y	2
K26K-XBFN4M	negative	Y	Y	ER_minus_HER2_minus	Y	4
K26K-XKVM9V	negative	Y	N	NA	N	4
K26K-Y6G3UY	negative	Y	N	NA	Y	4
K26K-Z6VH73	negative	Y	Y	ER_minus_HER2_minus	Y	4
K26K-7JJZ5M	LC+	Y	Y	NA	N	2
K26K-8CJT87	HC+	Y	Y	NA	N	2
K26K-8VL8EF	negative	Y	N	NA	N	6
K26K-8WJX97	HC+	Y	Y	ER_minus_HER2_minus	N	5
K26K-D4HD82	HC+	Y	Y	ER_minus_HER2_minus	N	2
K26K-DWJV7L	HC+	Y	Y	ER_plus_HER2_plus	N	4
K26K-ERLVQA	HC+	Y	Y	NA	N	3
K26K-NS7PMZ	HC+	Y	Y	ER_plus_HER2_minus	N	4
K26K-PA4Z16	HC+	Y	Y	ER_minus_HER2_minus	N	6
K26K-PV6WZJ	MC+	Y	N	NA	N	4
K26K-R8QP1R	LC+	Y	Y	NA	N	2
K26K-S43WPC	HC+	Y	Y	ER_plus_HER2_minus	N	3
K26K-T6MA5Q	MC+	Y	Y	ER_minus_HER2_minus	N	4
K26K-U1QUA8	HC+	Y	Y	ER_plus_HER2_minus	N	2
K26K-U6URF5	negative	Y	Y	NA	N	2
K26K-VNY7MN	HC+	Y	Y	ER_minus_HER2_minus	N	6
K26K-VXBVRG	LC+	Y	Y	NA	N	1
K26K-XSB5QT	HC+	Y	Y	ER_plus_HER2_minus	N	2

## Sheet: DKFZ-HIPO17 Pairs
Tumor ID	Sample Type	Chromothipsis scoring based on WGSeq	Chromothipsis scoring based on WESeq	Site Second Tumor	Original Diagnosis (First Primary Biopsy Showing Cancer; mm/yyyy)	Date Surgery Second Tumor (mm/yyyy)	Time between first and second tumor	Date of Diagnosis Second Tumor	IHC Subtype	Ploidy
0E5B	primary sample	yes	yes	left	07/2008	2010	2 years	07/2010	Luminal A	3
T2VO	refractory sample to OE5B	yes	yes	left	07/2008	2010		07/2010	Luminal A	4
4R5V	primary sample	no	no	right	2006	04/2012	6 years	primary tumor	Triple negative	6
4R5V_2	refractory sample	yes	yes	right	2006	04/2012		04/2012	Triple negative	2
B2HF	primary sample	yes	yes	right	07/2011	07/2014	3 years	primary tumor	Luminal B	6
B2HF_2	lymph node metastasis refractory	yes	yes	right	07/2011	07/2014		2014-05-14	Luminal B	3
HWX7	primary sample	low confidence	intermediate confidence	left	08/2011	12/2014	3 years	primary tumor	Luminal B	2
HWX7_2	pleura metastasis	low confidence	intermediate confidence	left	08/2011	12/2014		10/2014	Luminal B	2
WQL2	primary sample	no	no	right	07/2005	08/2012	7 years	primary tumor	Luminal B	2
WQL2_2	refractory sample (contralateral secondary disease)	no	no	right	07/2005	08/2012		08/2012	Luminal B	4
T6Z1	primary sample	yes	yes	left	08/2006	05/2012	6 years	primary tumor	Luminal B, HER2+	4
T6Z1_2	refractory sample	yes	yes	left	08/2006	05/2012		09/2012	Luminal B, HER2+	2
QYXQ	primary sample	yes	yes	left	10/2006	03/2007	5 months	primary tumor	Luminal A	3
QYXQ_2	refractory sample (contralateral secondary disease)	yes	yes	left	10/2006	03/2007		03/2007	Luminal A	6
46DP	primary sample	no	no	left	07/2010	12/2010	5 months	primary tumor	Triple negative	2
46DP_2	refractory sample (contralateral secondary disease)	yes	intermediate confidence	left	07/2010	12/2010		11/2010	Triple negative	4
39867J	primary sample	yes	yes	right	04/2006	11/2012	6 years	primary tumor	Luminal B, HER2+	2
39867J_2	refractory sample (contralateral secondary disease)	yes	yes	right	04/2006	11/2012		11/2012	Luminal B, HER2+	2
J63LAV	primary sample	yes	intermediate confidence	right	05/2011	10/2014	3 years	primary tumor	Luminal B	5
J63LAV_2	refractory sample (contralateral secondary disease)	no	intermediate confidence	right	05/2011	10/2014		10/2014	Luminal B	2
3DUGSZ	primary sample	yes	yes	right	11/2005	01/2008	2 years	primary tumor	Luminal B, HER2+	4
3DUGSZ_2	refractory sample	yes	yes	right	11/2005	01/2008		01/2008	Luminal B, HER2+	2

## Sheet: DKFZ-HIPO17 Non-paired samples
Case ID	Breast cancer subtype (based on immunohistochemistry)	Chromothipsis scoring (based on WESeq)	RNAseq (Yes/No)
H017-2RR2	HER2	yes	yes
H017-35XC	HER2	yes	yes
H017-8H0R	Luminal B, HER2+	yes	yes
H017-EDTK	HER2	yes	yes
H017-231B	HER2	yes	yes
H017-DBBB	Luminal B, HER2+	yes	yes
H017-4WQ1	Luminal A	yes	yes
H017-6F41	Luminal A	yes	yes
H017-75Z1	Luminal A	yes	yes
H017-9HTD	Luminal A	yes	yes
H017-A0GM	Luminal B	yes	yes
H017-DR8V	Luminal A	yes	yes
H017-HIHE	Luminal A	yes	yes
H017-KEQ4	Luminal A	yes	yes
H017-L1PK	Luminal A	yes	yes
H017-NL3B	Luminal A	yes	yes
H017-QYCP	Luminal A	yes	yes
H017-TC6T	Luminal A	yes	yes
H017-TDDP	Luminal A	yes	yes
H017-Y5G9	Luminal A	yes	yes
H017-YER1	Luminal B	yes	yes
H017-Z2AO	Luminal A	yes	yes
H017-ZQC5	Luminal A	yes	yes
H017-HY35	Luminal B	yes	yes
H017-I4ZX	Luminal B	yes	yes
H017-2S2Q	Luminal A	yes	yes
H017-9L95	Luminal B	yes	yes
H017-AC72	Luminal B	yes	yes
H017-AEK9	Luminal B	yes	yes
H017-IUCQ	Luminal B	yes	yes
H017-MA6O	Luminal B	yes	yes
H017-TM97	Luminal B	yes	yes
H017-TX2S	Luminal B	yes	yes
H017-X0Z1	Luminal B	yes	yes
H017-F11Y	Luminal B, HER2+	yes	yes
H017-5Y1T	Luminal B	yes	yes
H017-7DTJ	Luminal B	yes	yes
H017-L50R	Luminal B	yes	yes
H017-Q6FY	Luminal B	yes	yes
H017-TW0Z	Luminal B	yes	yes
H017-1ED9	Triple negative	yes	yes
H017-51CU	Triple negative	yes	yes
H017-7FNO	Triple negative	yes	yes
H017-8HNA	Triple negative	yes	yes
H017-8MNH	Triple negative	yes	yes
H017-YNSV	Triple negative	yes	yes
H017-F7FD	Triple negative	yes	yes
H017-OLIZ	Triple negative	yes	yes
H017-Q4W1	Triple negative	yes	yes
H017-HMXT	Triple negative	yes	yes
H017-DWJV	Luminal B, HER2+	yes	yes
H017-86DK	Luminal B	yes	yes
H017-AGV1	Luminal A	yes	yes
H017-E65C	Luminal B	yes	yes
H017-FYVH	Luminal A	yes	yes
H017-H9F4	Luminal B	yes	yes
H017-JVRW	Luminal B	yes	yes
H017-JXGE	Luminal B	yes	yes
H017-K6YC	Luminal A	yes	yes
H017-NF9D	Luminal A	yes	yes
H017-QK84	Luminal A	yes	yes
H017-RQX5	Luminal B	yes	yes
H017-RTA4	Luminal A	yes	yes
H017-SR1R	Luminal B	yes	yes
H017-TDM5	Luminal A	yes	yes
H017-VE5V	Luminal B	yes	yes
H017-WKH9	Luminal A	yes	yes
H017-WL6X	Luminal B, HER2+	yes	yes
H017-XV6H	Luminal A	yes	yes
H017-ZCYX	Luminal B	yes	yes
H017-A5W4	Luminal A	yes	yes
H017-CWV9	HER2	yes	yes
H017-D988	Luminal A	yes	yes
H017-LRU2	Triple negative	yes	yes
H017-LU50	Luminal B	yes	yes
H017-PMB1	Luminal A	yes	yes
H017-RZBM	Luminal B	yes	yes
H017-WHDD	Luminal B	yes	yes
H017-YA4W	Luminal B	yes	yes
H017-9LEL	Luminal B	yes	yes
H017-5NL5	Luminal B	yes	no
H017-CZYLQB	NA	yes	no
H017-FCD9	Luminal A	yes	no
H017-MZF3	Luminal A	yes	no
H017-N9L3	Luminal A	yes	no
H017-NPW2	Luminal A	yes	no
H017-PE7X	Luminal B	yes	no
H017-PF9X	Luminal B	yes	no
H017-Q13U	Luminal B	yes	no
H017-S62Y	Luminal B	yes	no
H017-SRT9	Luminal B	yes	no
H017-WZY6	Luminal B	yes	no

## Sheet: Timing rel. to polyploidization
Case ID	Chromothriptic chromosome	Chromothripsis status (confidence)	Copy number oscillations (states)	Timing of chromothripsis*
K26K-PV6WZJ	4	LC+	4-5-6-higher orders	after
K26K-PV6WZJ	11	LC+	4 6	before
K26K-8REHR3	3	MC+	2-4-6 higher orders	before
K26K-8REHR3	5	HC+	2 4 6 higher orders	before
K26K-8REHR3	11	LC+	2 4 6 higher orders	before
K26K-8REHR3	17	HC+	2 4 6 8	before
K26K-38J27P	4	HC+	3 4 5	after
K26K-38J27P	11	HC+	2 3 4 higher orders	after
K26K-38J27P	17	HC+	2 4	before
K26K-8SNWXL	2	HC+	3 4 6 higher orders	after
K26K-8SNWXL	11	HC+	3 4 7 higher orders	after
K26K-8SNWXL	12	MC+	4 5 6 7 higher orders	after
K26K-8SNWXL	14	HC+	5 6 7 higher orders	after
K26K-1GUTR3	1	HC+	4 5 6	after
K26K-1GUTR3	1	LC+	3 4 5	after
K26K-1GUTR3	4	HC+	3 4 5	after
K26K-1GUTR3	4	HC+	2 3 4 5 higher orders	after
K26K-1GUTR3	5	LC+	3 4 5	after
K26K-1GUTR3	9	HC+	2 3 4	after
K26K-1GUTR3	11	HC+	2 3 4 5	after
K26K-1GUTR3	11	HC+	2 3 4 5 higher orders	after
K26K-1GUTR3	17	HC+	2 4 5 6 7	after
K26K-1GUTR3	20	HC+	2 3 4 5 higher orders	after
K26K-JMFZN8	4	MC+	2 4	before
K26K-JMFZN8	7	HC+	2 4 higher orders	before
K26K-NRBK1M	5	LC+	3 4 5	after
K26K-3Y6UFG	1	LC+	2 4 higher orders	before
K26K-3Y6UFG	2	LC+	2 4 6	before
K26K-3Y6UFG	21	HC+	2 4	before
K26K-T6MA5Q	4	MC+	4 6 8	before
K26K-T6MA5Q	5	LC+	4 5	before
K26K-U13K48	5	LC+	4 6 8	before
K26K-SU166F	8	HC+	4 5 6 higher orders	after
K26K-SU166F	11	MC+	4 5 6 higher orders	after
K26K-3J6HU5	18	HC+	3 4 5	after
K26K-BQAVRQ	3	HC+	3 4 5 higher orders	after
K26K-53KLXE	4	MC+	3 4 5	after
K26K-DWJV7L	8	HC+	3 4 5 6 higher orders	after
4R5V_T02	2	HC+	2 3	before
4R5V_T02	11	HC+	1 2 3	before
4R5V_T02	12	HC+	2 3	before
4R5V_T02	18	MC+	1 2 3	before
B2HF-T01/02	17	HC+	2 3	before
J63LAV-T01	11	HC+	2 4 higher orders	before
*"before" means chromothripsis before genome doubling
"after" means chromothripsis after polyploidization
"higher orders" for the ploidy means more than 6
