# Supplementary material for: Chromothripsis in Human Breast Cancer
Source: Oxford University Press journal article supplement (doi:10.1158/0008-5472.can-20-1920), 2020-09-24
Supplement: 00085472can201920-sup-244800_2_supp_6563061_qgn2gw.xlsx [file 00085472can201920-sup-244800_2_supp_6563061_qgn2gw.xlsx]

## Sheet: algorithm-based scoring
Tumor ID	Chromosome	Start	End	Number of structural variants	pval_exp_chr	max_number_oscillating_CN_segments_2_states	max_number_oscillating_CN_segments_3_states	visual_CT_score_match
K26K-11UKEH	4	80949377	182605670	165	0	5	7	Y	Concordance between visual and algorithm-based scoring
K26K-11UKEH	6	91528344	167536313	186	0	5	8	Y	Percentage match per patient	84.5638	%
K26K-1ER5BG	6	122915056	136740911	24	0	5	7	Y
K26K-1ER5BG	12	38056487	51221634	14	0	3	11	Y
K26K-1GUTR3	1	31792401	209201736	34	0	9	15	Y
K26K-1GUTR3	4	1307414	76519378	106	0	6	45	Y
K26K-1GUTR3	5	32413014	41176455	16	1.3828937994731e-12	5	11	N
K26K-1GUTR3	9	78509381	138726235	9	4.1223072733132e-09	3	16	Y
K26K-1GUTR3	17	30193748	78036587	43	0	5	11	Y
K26K-1YV1NR	4	617441	13416761	45	0	6	19	Y
K26K-1YV1NR	7	16986689	142969277	17	7.40288941258882e-11	8	12	N
K26K-1YV1NR	9	5871208	135944833	23	0.000945272549154885	6	11	N
K26K-1YV1NR	11	848836	80604978	127	0	7	14	Y
K26K-1YV1NR	14	20538867	102159372	121	0	2	10	Y
K26K-1YV1NR	21	32442669	48055449	48	0	4	11	Y
K26K-2HQFG6	2	30077247	176730703	13	1.26994328386587e-08	11	13	N
K26K-2HQFG6	6	28234173	156830427	38	0	11	27	N
K26K-2HQFG6	7	1868394	146926056	38	0	5	9	N
K26K-2HQFG6	13	21638919	111103411	16	2.35634067813351e-09	8	9	Y
K26K-2LSYUD	7	116978078	154223190	185	0	6	8	Y
K26K-2LSYUD	14	45380506	102012762	26	0	8	9	Y
K26K-372K7Q	1	23332021	239571744	32	0	7	9	N
K26K-372K7Q	10	11959872	121557009	12	4.63152972285386e-06	7	11	N
K26K-372K7Q	12	12186388	123330374	44	0	3	9	N
K26K-38J27P	3	11098669	66463796	18	0	7	10	N
K26K-38J27P	4	5813005	42244974	15	0	4	14	Y
K26K-38J27P	9	4866446	129114969	12	0.000246841317297575	4	10	N
K26K-38J27P	11	1020372	123893104	245	0	6	10	Y
K26K-38J27P	17	27298878	53190140	19	0	7	7	Y
K26K-3J6HU5	18	29870468	59145278	13	5.55111512312578e-16	4	14	Y
K26K-3SV5GJ	1	21920726	109225637	56	0	3	7	Y
K26K-3SV5GJ	6	3255209	151495813	40	1.65605418267489e-10	10	11	Y
K26K-3SV5GJ	8	50973393	141444199	84	0	5	11	N
K26K-3SV5GJ	14	23468086	78136896	46	0	3	9	Y
K26K-3SV5GJ	19	1459453	58912159	33	1.40665257220007e-13	8	9	Y
K26K-3SV5GJ	20	15439252	59895449	47	0	5	12	Y
K26K-49T9ZE	1	43104606	205621266	12	1.71929137593452e-12	7	17	N
K26K-49T9ZE	19	38085642	58891236	105	0	8	8	Y
K26K-4AUP7Y	2	178878285	201733082	8	4.1223072733132e-09	4	10	N
K26K-4RJ5UK	11	701092	94552332	14	5.64436275496405e-11	6	16	N
K26K-53KLXE	6	64893609	145037294	69	0	3	7	Y
K26K-53KLXE	14	35688981	37753863	18	0	3	9	N
K26K-54UFHM	22	17533897	50276475	61	0	3	8	Y
K26K-5JM4B6	12	3521767	44578594	16	0	9	9	Y
K26K-5NNPD2	3	180436131	193581738	11	1.3828937994731e-12	7	7	N
K26K-5NNPD2	6	45003699	151059469	74	0	8	29	Y
K26K-5NNPD2	7	3595909	121917674	62	0	17	51	Y
K26K-5NNPD2	19	2460077	56934961	115	0	4	8	Y
K26K-6DAZ5U	6	48871412	50974666	8	3.33066907387547e-16	3	8	N
K26K-6DAZ5U	8	41767009	109110551	10	2.53130849614536e-14	7	11	Y
K26K-6DAZ5U	15	24815147	100759789	11	3.33066907387547e-16	3	7	N
K26K-6FAWPW	10	57930261	105343526	27	0	11	11	Y
K26K-6GJXKU	2	88361666	200090735	12	3.23524648182527e-08	3	8	Y
K26K-6GJXKU	6	627690	83697127	35	0	10	10	N
K26K-6PJ115	11	59065873	81256076	27	0	8	14	N
K26K-6TUAKJ	1	150014231	230474187	86	0	6	12	Y
K26K-6TUAKJ	8	25213710	144987743	51	0	15	15	N
K26K-7JJZ5M	22	18588683	28957722	12	0	6	12	N
K26K-7K2ESR	9	114706484	139063990	13	5.55111512312578e-16	7	7	Y
K26K-89CAXB	3	40691798	188158644	10	9.99200722162641e-16	18	25	N
K26K-8CJT87	8	33589000	87183354	52	0	3	12	Y
K26K-8CJT87	10	78663714	85271294	26	0	6	12	N
K26K-8CJT87	14	35261591	106525699	55	0	2	7	Y
K26K-8CJT87	20	3706544	25118018	12	0	6	11	N
K26K-8REHR3	1	10795735	216046171	21	8.75965966429249e-14	3	7	N
K26K-8REHR3	2	11283389	106539418	18	3.1641356201817e-14	4	9	N
K26K-8REHR3	5	9749510	57046304	58	0	8	8	Y
K26K-8REHR3	17	8391792	39483479	124	2.22044604925031e-16	11	11	Y
K26K-8SNWXL	14	25575793	65699042	22	0	6	23	Y
K26K-8SNWXL	16	2824824	28591875	27	6.75515373638191e-08	4	10	N
K26K-8SNWXL	17	32246625	75133380	109	0	5	7	N
K26K-8SNWXL	20	19336766	55220250	92	0	5	7	N
K26K-8WJX97	1	68689025	223458993	11	2.63111754605916e-12	5	13	N
K26K-8WJX97	2	21362738	232603111	26	0	23	26	N
K26K-8WJX97	11	15631668	134880713	12	0.000255390989244875	6	10	N
K26K-8WJX97	15	22766019	63068014	11	3.33066907387547e-16	8	25	Y
K26K-8WJX97	17	30242078	40755438	10	0	4	11	Y
K26K-92LDBN	2	69709811	234003416	8	1.08740239035399e-10	15	15	N
K26K-96DFP9	19	6823384	46899833	8	6.16989237478549e-10	5	7	Y
K26K-B8MUBJ	1	54691954	243119849	11	3.51929596575928e-12	4	9	N
K26K-BQAVRQ	3	12763317	68853709	64	0	4	9	Y
K26K-BQAVRQ	10	312169	88655400	147	0	3	7	Y
K26K-BRET3U	7	17602488	105197154	12	9.6034291630076e-14	7	12	N
K26K-BRET3U	11	26373082	85387167	72	0	7	17	Y
K26K-C6D9GA	1	17346373	206208181	12	1.99895412403839e-05	4	16	N
K26K-C6D9GA	4	149327530	152488269	18	0	9	11	N
K26K-CLCZYM	2	42321747	100168583	20	7.58091367458746e-11	6	15	Y
K26K-CLCZYM	3	62546598	178812940	94	0	3	9	Y
K26K-CLCZYM	9	145528	130269280	43	0	5	37	Y
K26K-CLCZYM	11	69801651	107473232	38	1.22124532708767e-15	4	14	N
K26K-CLCZYM	13	28368777	104756861	46	0	9	18	Y
K26K-CLCZYM	18	521069	14649230	12	0.00338696909354697	4	10	N
K26K-DDJVUJ	11	56185916	96602320	10	1.3828937994731e-12	2	11	N
K26K-DMU6TK	3	20495380	177954335	22	0	4	11	N
K26K-DMU6TK	6	2651331	41767574	21	0.000694884468801615	5	8	Y
K26K-DMU6TK	11	34790505	56581164	14	3.33066907387547e-16	7	7	Y
K26K-DWJV7L	7	833977	156584087	34	2.22044604925031e-16	32	32	Y
K26K-DWJV7L	8	102511497	137432099	64	0	8	9	Y
K26K-DWJV7L	11	58909624	134029913	65	0	7	7	Y
K26K-ELSESF	3	29728103	163216305	62	0	7	14	Y
K26K-ELSESF	20	1672941	44948760	89	3.1641356201817e-13	13	20	Y
K26K-ERLVQA	1	39093370	103038380	14	7.7715611723761e-16	3	8	N
K26K-ERLVQA	13	22175490	114293934	25	0	7	7	Y
K26K-ERLVQA	21	22731814	40002442	115	0	6	7	Y
K26K-EUWQV4	1	1289457	89677440	26	0	9	9	Y
K26K-EUWQV4	15	20494353	100930281	79	0	12	16	Y
K26K-F4BWZA	2	17389315	238986812	24	0	11	18	Y
K26K-F4BWZA	4	23329663	159245657	17	2.31459296173853e-12	4	7	N
K26K-F4BWZA	6	7038868	154407036	17	4.44089209850063e-16	19	25	Y
K26K-F4BWZA	7	16667031	155843906	24	3.33066907387547e-15	13	21	N
K26K-F4BWZA	14	51155122	86007567	8	0	2	11	N
K26K-F7Z1YC	2	174454736	199540658	33	0	6	9	Y
K26K-F7Z1YC	X	85414414	140313802	32	0	3	10	N
K26K-G1K1C8	11	26518770	37403236	8	0	7	7	Y
K26K-G4S7NK	7	67911360	94869876	16	0	2	10	Y
K26K-G7RGRH	1	36385101	207484693	109	0	10	13	N
K26K-G7RGRH	5	21987797	109328973	35	0	5	9	Y
K26K-G7RGRH	6	55952853	69423815	11	4.1223072733132e-09	7	11	N
K26K-G7RGRH	7	28619465	87727836	12	3.33066907387547e-16	7	7	N
K26K-G7RGRH	10	16939642	110588446	139	0	6	16	N
K26K-G7RGRH	13	20713272	110174326	59	0	2	7	N
K26K-G7RGRH	15	49336332	102235836	267	0	4	9	Y
K26K-G7RGRH	18	56264212	69398090	37	0	5	11	Y
K26K-GGT9WV	1	92470586	178103859	8	7.78034303650088e-11	9	13	Y
K26K-GGT9WV	5	89574572	165937691	13	0	5	15	Y
K26K-GGT9WV	11	41093820	79986721	35	7.7715611723761e-16	4	10	Y
K26K-GP1DEZ	1	41894952	147812255	13	3.85695142490761e-10	3	12	N
K26K-GP1DEZ	11	21103268	107754624	8	2.3497893630875e-09	3	12	N
K26K-GQ6XGU	12	2941729	129846578	26	2.04969374806296e-12	5	14	N
K26K-HH4Q3M	1	59714358	247254132	24	0	12	12	N
K26K-HH4Q3M	3	2631789	180399643	44	0	7	13	N
K26K-HH4Q3M	5	30866033	87873547	10	8.03579856888392e-05	6	12	N
K26K-HH4Q3M	6	13788075	66533793	11	1.2699216156431e-07	8	9	N
K26K-HKH6GS	3	42055072	175864259	14	0	4	18	N
K26K-HKH6GS	13	96134277	106920300	10	4.44089209850063e-16	9	11	N
K26K-HKH6GS	X	1029684	49454377	12	0.000207707121745671	5	15	Y
K26K-JF2LWZ	3	35836306	186554839	33	0	5	15	Y
K26K-JF2LWZ	21	15886476	41644442	27	0	5	12	Y
K26K-JG8K8P	1	24808915	209900746	12	2.57223797817119e-10	12	25	Y
K26K-JG8K8P	2	126585393	194139939	9	1.3828937994731e-12	2	12	Y
K26K-JG8K8P	4	3444762	100161115	10	1.21166806441586e-05	6	10	N
K26K-JG8K8P	11	35387409	75785262	8	0	5	7	Y
K26K-JG8K8P	22	20135832	50992651	8	1.20995657937328e-10	3	8	N
K26K-JMFZN8	1	197095596	228616223	48	0	2	12	Y
K26K-JMFZN8	4	20547382	61451858	10	2.23532303778029e-12	3	14	Y
K26K-JMFZN8	8	31121753	36845175	8	7.55027151910781e-11	2	8	N
K26K-KBMSKG	4	4681422	190187978	15	0	4	8	N
K26K-KBMSKG	6	26328190	170558363	8	0	3	10	N
K26K-KBMSKG	7	2796918	135010377	15	0	4	10	N
K26K-KBMSKG	8	46911915	97699788	27	0	2	14	Y
K26K-KBMSKG	12	21529673	127431967	13	0	14	21	N
K26K-KBMSKG	15	31505496	97686894	11	0	3	9	N
K26K-KBMSKG	21	17928278	48094125	9	0	4	7	N
K26K-KQYMSV	13	32206976	100700305	9	3.40190488422598e-05	3	7	N
K26K-LKKMR2	3	132580202	163113973	12	3.33066907387547e-16	4	9	Y
K26K-LKKMR2	6	16351603	153657852	34	0	3	15	Y
K26K-LKKMR2	8	22240007	141867847	54	0	3	18	Y
K26K-LKKMR2	11	61546529	120292223	21	0	3	7	Y
K26K-LKKMR2	17	7136392	76200374	26	0	5	21	Y
K26K-LKKMR2	20	36717089	52727051	9	1.3828937994731e-12	3	12	Y
K26K-LUMBC5	11	21925222	104157864	78	0	5	8	Y
K26K-MNVK2W	10	43189938	123495307	37	0	11	12	Y
K26K-MNVK2W	14	54093055	66911443	9	7.55027151910781e-11	7	7	Y
K26K-MNVK2W	20	1248794	55008623	31	0	4	10	Y
K26K-N2D9XV	3	12594538	151549408	31	0	17	23	Y
K26K-N2D9XV	6	16036427	144182464	25	2.95848034959079e-09	3	7	Y
K26K-N2D9XV	10	23112542	121559989	16	1.11022302462516e-16	4	8	Y
K26K-N422KN	7	71511375	148944403	39	0	16	22	N
K26K-N422KN	8	33281603	136372740	28	0	3	9	Y
K26K-NDDF92	6	297399	9886684	9	0.000111488887661326	7	7	N
K26K-NDDF92	17	30909271	80735439	101	0	4	7	Y
K26K-NKAGPR	1	42864730	223915838	10	7.21644966006352e-15	4	10	N
K26K-NRBK1M	5	58410987	176983476	9	2.62756483238036e-12	5	12	N
K26K-NS7PMZ	11	63924406	77737968	14	4.44089209850063e-16	5	7	Y
K26K-PA4Z16	1	114757742	246912427	24	0	6	9	N
K26K-PA4Z16	3	74698750	146869649	10	1.38333788868295e-12	2	8	N
K26K-PA4Z16	6	2503492	145794170	85	0	7	15	Y
K26K-PA4Z16	8	40766656	124087789	33	4.44089209850063e-16	5	13	Y
K26K-PA4Z16	10	75909808	126651989	11	0	6	9	N
K26K-PA4Z16	13	36963576	104486868	22	3.26105809023147e-12	5	11	N
K26K-PAZNZP	17	584965	75310524	90	0	3	13	Y
K26K-PCA7BN	3	432496	109466131	17	0.000899929462148674	20	20	Y
K26K-PCA7BN	9	4206016	130886500	83	0	3	11	Y
K26K-PDJUSD	1	36736502	241652981	252	0	9	11	Y
K26K-PDJUSD	2	70891688	193262076	12	0	15	35	Y
K26K-PDJUSD	5	16520926	150650035	18	1.11022302462516e-16	9	29	Y
K26K-PDJUSD	6	105956302	134748430	25	0	2	11	Y
K26K-PDJUSD	9	4186321	115361156	280	0	4	21	Y
K26K-PDJUSD	15	20017427	102030348	293	0	5	7	Y
K26K-PDJUSD	16	17192430	75981985	14	0	3	13	Y
K26K-PPGH4E	4	67525184	111544342	10	4.44089209850063e-16	4	7	Y
K26K-PV6WZJ	1	8032132	119255499	14	4.82459887790609e-05	5	16	N
K26K-PV6WZJ	2	46709416	157796804	15	1.58317803311547e-12	10	13	N
K26K-PV6WZJ	4	35194998	155695603	14	3.2236435743016e-12	5	16	N
K26K-PV6WZJ	11	4704232	85114043	18	6.16173778666962e-14	10	25	N
K26K-PV6WZJ	X	56440957	155228458	14	8.39841529653995e-11	5	19	N
K26K-Q4JZ17	2	15888243	177444209	16	7.5041084457439e-11	10	22	N
K26K-QXX4LD	1	32247014	224948061	32	0	13	13	N
K26K-QXX4LD	X	54997742	121180229	11	0	4	7	N
K26K-R4ATRT	8	97877141	130140247	36	0	9	12	Y
K26K-R8KRU9	7	1626948	56470474	123	7.7715611723761e-16	6	7	Y
K26K-R8KRU9	10	67302200	134243997	14	0	4	18	Y
K26K-R8KRU9	11	50610229	112285366	31	0	1	9	N
K26K-S43WPC	2	139470938	212674488	138	0	4	7	Y
K26K-S43WPC	3	45560122	142054502	14	0	16	18	Y
K26K-S43WPC	6	134335722	152857538	102	0	5	12	N
K26K-S43WPC	8	36615066	118754677	178	0	5	7	Y
K26K-S43WPC	9	108243105	136870761	36	0	7	14	Y
K26K-S43WPC	14	21368811	103783867	13	2.89768209427166e-14	5	11	N
K26K-SAA77Y	1	21956470	236168718	148	0	5	25	Y
K26K-SAA77Y	2	144500120	215729418	19	7.55027151910781e-11	7	7	Y
K26K-SAA77Y	4	157625286	187609477	14	4.1223072733132e-09	7	9	N
K26K-SAA77Y	5	52401207	171496521	83	0	3	14	N
K26K-SJGG4M	8	86754520	144395999	39	0	8	8	Y
K26K-SSBAF2	1	121115041	222509068	138	0	5	9	Y
K26K-SSBAF2	3	11750418	194312016	27	0	5	10	N
K26K-SSBAF2	4	103521583	140070814	16	0	22	26	Y
K26K-SSBAF2	6	14191891	159267572	45	0	5	11	Y
K26K-SSBAF2	15	31120987	98201984	374	0	8	11	Y
K26K-SSBAF2	20	33176324	62891990	152	0	7	7	Y
K26K-T6MA5Q	3	61635145	179362325	32	0	6	10	Y
K26K-T6MA5Q	8	34478666	144828911	20	0	10	10	N
K26K-TL7317	1	22390412	154225807	13	1.990363429627e-10	5	10	N
K26K-TL7317	13	33323921	79979574	28	4.15455581048718e-09	4	10	Y
K26K-U1QUA8	19	1660878	55641395	90	0	7	7	Y
K26K-U48257	1	171444007	192351463	315	0	3	9	Y
K26K-U48257	4	52729445	184505701	46	0	5	12	Y
K26K-U48257	7	26118530	123823624	80	0	12	17	Y
K26K-U48257	12	1046053	93143918	219	0	8	14	Y
K26K-U48257	16	51498233	72578237	99	0	4	9	N
K26K-U48257	18	4209056	11432614	16	0	3	8	Y
K26K-U48257	20	34460199	56294126	176	0	5	8	Y
K26K-UVAXJ4	5	75061	161812120	50	0	12	23	Y
K26K-V2PF6M	1	24952032	225651325	60	0	6	12	N
K26K-V2PF6M	3	31826886	35271438	9	0	2	8	Y
K26K-V2PF6M	5	30422599	152882051	22	1.11022302462516e-15	3	10	Y
K26K-V2PF6M	7	66931576	70068913	17	0	2	10	N
K26K-V2PF6M	9	33681390	37447065	10	0	5	10	N
K26K-V2PF6M	12	70353709	97808032	28	0	5	21	Y
K26K-V2PF6M	14	50264883	101703911	26	0	4	9	Y
K26K-V3TLD6	6	62004877	142507841	36	0	2	7	Y
K26K-VAHD5J	1	119608030	247084968	19	0	3	14	N
K26K-VAHD5J	6	10081405	76880906	11	1.26810688360068e-05	8	11	N
K26K-VNY7MN	17	43318400	76042023	24	0	3	13	Y
K26K-VXBVRG	1	39968611	161692746	10	4.2410519540681e-14	7	8	N
K26K-VXBVRG	2	27960159	223280074	16	0	7	13	N
K26K-VXBVRG	8	5280585	139008167	13	1.6149870951665e-07	5	11	N
K26K-VXBVRG	15	41160149	71679555	10	0	6	12	N
K26K-WPZ6MB	10	494673	32467872	23	1.22124532708767e-15	13	13	N
K26K-XAEMKV	11	2868973	38637893	20	8.99058605341452e-13	9	12	Y
K26K-XBX9RY	2	21762861	85120777	12	3.33066907387547e-16	22	22	Y
K26K-XBX9RY	5	91273893	164716106	64	0	4	15	N
K26K-XBX9RY	6	67563945	122053399	25	2.53130849614536e-14	4	8	Y
K26K-XBX9RY	12	41950798	89026921	51	0	2	7	Y
K26K-XBX9RY	X	11732799	152027986	125	0	9	15	Y
K26K-Y6G3UY	1	56419326	61338738	8	3.33066907387547e-16	9	9	N
K26K-Y6G3UY	11	29331380	69809282	43	0	8	8	N
K26K-Y9BDCK	16	6785701	13860355	10	0	7	16	N
K26K-YB2V81	15	43226795	69376123	8	1.3828937994731e-12	7	11	Y
K26K-YU91XW	6	4887312	64057506	26	0	13	27	N
K26K-YYMX7V	1	66657245	245220750	32	0	5	8	Y
K26K-YYMX7V	22	18273777	40907573	19	0	7	7	Y
K26K-Z559NG	2	32473393	142679779	15	8.85125306382406e-12	5	7	N
K26K-Z559NG	8	2684200	43221882	30	0	3	7	Y
K26K-Z559NG	11	12249759	106254469	18	4.60020910253434e-12	7	17	Y
K26K-Z559NG	12	57738743	133334014	13	0	4	11	Y
K26K-Z559NG	14	24223158	75521825	91	0	4	9	Y
K26K-Z559NG	22	26451419	33741667	89	0	1	7	N
K26K-Z8Z4HX	4	2845775	47211942	15	1.17088050366476e-09	7	7	Y
K26K-ZUWXZY	11	75429337	129877674	14	7.7715611723761e-16	22	30	Y

## Sheet: visual scoring
Tumor ID	Chromosome	Chromothripsis_score (high confidence, intermediate confidence)	Number of switches between copy-number states	Size of chromothriptic region (Mb)
K26K-1ER5BG	6	IC+	9	120-170
K26K-1ER5BG	11	HC+	10	45-75
K26K-1ER5BG	12	HC+	10	35-55
K26K-1ER5BG	18	IC+	9	0-30
K26K-1GUTR3	1	HC+	10	30-50
K26K-1GUTR3	1	IC+	9	60-110
K26K-1GUTR3	4	HC+	10	0-50
K26K-1GUTR3	4	HC+	10	50-90
K26K-1GUTR3	9	HC+	10	70-100
K26K-1GUTR3	11	HC+	10	0-50
K26K-1GUTR3	11	HC+	10	60-80
K26K-1GUTR3	17	HC+	10	25-50
K26K-1GUTR3	20	HC+	10	15-45
K26K-1GUTR3	20	HC+	10	50-65
K26K-1YV1NR	3	HC+	10	0-40
K26K-1YV1NR	4	HC+	10	0-20
K26K-1YV1NR	6	IC+	8	0-50
K26K-1YV1NR	11	HC+	10	0-50
K26K-1YV1NR	14	HC+	10	20-70
K26K-1YV1NR	15	IC+	9	20-70
K26K-1YV1NR	21	IC+	9	30-50
K26K-2HQFG6	1	IC+	8	50-100
K26K-2HQFG6	8	HC+	10	50-90
K26K-2HQFG6	11	IC+	9	30-60
K26K-2HQFG6	12	HC+	10	0-15
K26K-2HQFG6	13	IC+	8	95-105
K26K-2HQFG6	15	HC+	10	70-100
K26K-2HQFG6	17	HC+	10	55-85
K26K-2HQFG6	19	HC+	10	5-55
K26K-2LSYUD	2	HC+	10	20-70
K26K-2LSYUD	2	HC+	10	110-130
K26K-2LSYUD	7	IC+	8	10-60
K26K-2LSYUD	7	HC+	10	110-160
K26K-2LSYUD	8	HC+	10	30-80
K26K-2LSYUD	8	HC+	10	90-110
K26K-2LSYUD	9	HC+	10	0-40
K26K-2LSYUD	11	IC+	9	25-75
K26K-2LSYUD	14	HC+	10	40-90
K26K-2LSYUD	16	IC+	9	15-35
K26K-2LSYUD	19	HC+	10	05-40
K26K-3J6HU5	12	IC+	8	0-50
K26K-3J6HU5	18	HC+	10	25-65
K26K-3SV5GJ	1	HC+	10	60-110
K26K-3SV5GJ	3	HC+	10	0-50
K26K-3SV5GJ	3	HC+	10	110-130
K26K-3SV5GJ	4	HC+	10	35-70
K26K-3SV5GJ	6	IC+	9	110-160
K26K-3SV5GJ	7	IC+	9	110-160
K26K-3SV5GJ	10	IC+	8	50-80
K26K-3SV5GJ	11	HC+	10	50-90
K26K-3SV5GJ	11	HC+	10	100-135
K26K-3SV5GJ	12	HC+	10	0-50
K26K-3SV5GJ	13	IC+	8	40-60
K26K-3SV5GJ	14	IC+	8	20-40
K26K-3SV5GJ	16	IC+	8	0-20
K26K-3SV5GJ	16	HC+	10	55-60
K26K-3SV5GJ	17	HC+	10	20-70
K26K-3SV5GJ	18	IC+	9	30-80
K26K-3SV5GJ	19	HC+	10	15-25
K26K-3SV5GJ	20	HC+	10	45-65
K26K-3SV5GJ	22	IC+	9	0-50
K26K-3Y6UFG	11	HC+	10	60-90
K26K-3Y6UFG	21	HC+	10	15-50
K26K-4AUP7Y	6	IC+	9	40-80
K26K-4PEUSL	7	HC+	10	15-65
K26K-5JM4B6	1	HC+	10	50-100
K26K-5JM4B6	12	HC+	10	0-40
K26K-5NNPD2	6	IC+	7	0-50
K26K-5NNPD2	6	HC+	10	60-85
K26K-5NNPD2	6	IC+	8	120-160
K26K-5NNPD2	7	HC+	10	05-55
K26K-5NNPD2	9	IC+	9	0-40
K26K-5NNPD2	11	HC+	10	65-95
K26K-5NNPD2	15	IC+	9	20-35
K26K-5NNPD2	17	HC+	10	20-70
K26K-5NNPD2	19	HC+	10	15-60
K26K-6DAZ5U	8	IC+	7	40-90
K26K-6DAZ5U	8	IC+	9	105-145
K26K-6DAZ5U	11	HC+	10	30-80
K26K-6DAZ5U	X	IC+	8	45-95
K26K-6FAWPW	10	IC+	8	55-105
K26K-6GJXKU	2	HC+	10	190-240
K26K-6GJXKU	5	IC+	9	35-70
K26K-6GJXKU	8	IC+	8	80-125
K26K-6GJXKU	11	HC+	10	50-100
K26K-6GJXKU	15	HC+	10	30-80
K26K-6GJXKU	17	HC+	10	10-30
K26K-6TUAKJ	1	HC+	10	140-240
K26K-6TUAKJ	11	HC+	10	0-25
K26K-6TUAKJ	11	IC+	9	65-85
K26K-6TUAKJ	15	IC+	8	75-105
K26K-6TUAKJ	20	HC+	10	30-60
K26K-7K2ESR	3	HC+	10	90-140
K26K-7K2ESR	3	IC+	9	170-200
K26K-7K2ESR	9	HC+	10	110-145
K26K-7K2ESR	19	HC+	10	0-30
K26K-7K2ESR	X	IC+	8	50-100
K26K-7UH38T	X	IC+	8	0-50
K26K-8CJT87	3	HC+	10	110-160
K26K-8CJT87	8	HC+	10	30-80
K26K-8CJT87	9	IC+	8	120-140
K26K-8CJT87	11	HC+	10	10-40
K26K-8CJT87	11	HC+	10	65-90
K26K-8CJT87	14	HC+	10	60-110
K26K-8CJT87	X	HC+	10	50-100
K26K-8REHR3	3	IC+	9	70-120
K26K-8REHR3	5	HC+	10	10-50
K26K-8REHR3	6	IC+	8	100-120
K26K-8REHR3	17	HC+	10	0-40
K26K-8SNWXL	2	HC+	10	180-200
K26K-8SNWXL	10	HC+	10	40-60
K26K-8SNWXL	11	HC+	10	45-90
K26K-8SNWXL	12	IC+	9	0-30
K26K-8SNWXL	14	HC+	10	20-80
K26K-8SNWXL	19	IC+	9	35-55
K26K-8WJX97	6	IC+	8	15-65
K26K-8WJX97	9	HC+	10	110-140
K26K-8WJX97	15	IC+	8	50-100
K26K-8WJX97	17	HC+	10	20-45
K26K-9G8979	4	HC+	10	0-50
K26K-9G8979	6	HC+	10	90-140
K26K-9G8979	8	HC+	10	80-130
K26K-9G8979	10	HC+	10	60-90
K26K-9G8979	11	HC+	10	40-90
K26K-9G8979	17	HC+	10	40-80
K26K-11UKEH	1	HC+	10	30-70
K26K-11UKEH	4	HC+	10	0-40
K26K-11UKEH	4	IC+	8	50-80
K26K-11UKEH	4	HC+	10	115-165
K26K-11UKEH	5	HC+	10	40-65
K26K-11UKEH	6	HC+	10	110-170
K26K-11UKEH	7	IC+	8	50-70
K26K-11UKEH	7	IC+	8	110-160
K26K-11UKEH	8	HC+	10	10-50
K26K-11UKEH	X	IC+	8	120-150
K26K-38J27P	4	HC+	10	0-45
K26K-38J27P	6	IC+	8	110-140
K26K-38J27P	11	HC+	10	30-80
K26K-38J27P	17	HC+	10	25-65
K26K-49T9ZE	11	IC+	8	45-75
K26K-49T9ZE	19	HC+	10	35-60
K26K-49T9ZE	20	HC+	10	30-65
K26K-53KLXE	1	IC+	8	160-210
K26K-53KLXE	3	HC+	10	120-160
K26K-53KLXE	4	IC+	8	80-130
K26K-53KLXE	6	IC+	8	40-60
K26K-53KLXE	6	HC+	10	100-150
K26K-53KLXE	8	IC+	9	30-50
K26K-53KLXE	11	HC+	10	65-135
K26K-54UFHM	3	HC+	10	0-50
K26K-54UFHM	16	HC+	10	30-65
K26K-54UFHM	17	HC+	10	45-80
K26K-54UFHM	20	HC+	10	0-20
K26K-54UFHM	22	HC+	10	15-50
K26K-59LEYZ	16	IC+	9	20-40
K26K-92LDBN	9	IC+	8	85-100
K26K-96DFP9	11	IC+	9	40-85
K26K-96DFP9	19	HC+	10	05-50
K26K-372K7Q	11	IC+	9	30-80
K26K-372K7Q	11	IC+	8	115-135
K26K-372K7Q	16	HC+	10	05-35
K26K-372K7Q	19	HC+	10	0-50
K26K-372K7Q	20	HC+	10	0-50
K26K-372K7Q	X	IC+	8	0-50
K26K-B3P4PS	11	HC+	10	50-90
K26K-B3P4PS	20	HC+	10	10-55
K26K-BQAVRQ	3	HC+	10	10-40
K26K-BQAVRQ	10	HC+	10	70-120
K26K-BRET3U	9	IC+	8	120-145
K26K-BRET3U	11	IC+	8	45-85
K26K-BRET3U	12	IC+	8	55-75
K26K-BRET3U	14	IC+	9	25-75
K26K-BRET3U	17	HC+	10	30-75
K26K-C6D9GA	13	HC+	10	65-115
K26K-CLCZYM	2	IC+	8	60-100
K26K-CLCZYM	3	HC+	10	90-170
K26K-CLCZYM	7	IC+	8	60-95
K26K-CLCZYM	8	HC+	10	100-150
K26K-CLCZYM	9	HC+	10	80-130
K26K-CLCZYM	13	HC+	10	20-45
K26K-CLCZYM	16	IC+	8	55-70
K26K-CLCZYM	17	HC+	10	25-75
K26K-D4HD82	20	HC+	10	45-65
K26K-DDJVUJ	8	HC+	10	0-50
K26K-DDJVUJ	14	HC+	10	20-70
K26K-DDJVUJ	17	HC+	10	45-75
K26K-DMU6TK	6	HC+	10	0-45
K26K-DMU6TK	11	HC+	10	30-60
K26K-DMU6TK	14	HC+	10	30-60
K26K-DMU6TK	X	HC+	10	85-120
K26K-DWJV7L	7	HC+	10	110-160
K26K-DWJV7L	8	HC+	10	100-140
K26K-DWJV7L	11	IC+	8	65-90
K26K-ELSESF	3	IC+	8	15-45
K26K-ELSESF	3	HC+	10	100-150
K26K-ELSESF	9	HC+	10	0-30
K26K-ELSESF	17	HC+	10	30-80
K26K-ELSESF	20	HC+	10	0-30
K26K-ELSESF	20	IC+	8	40-65
K26K-ELSESF	X	HC+	10	0-25
K26K-ERLVQA	3	HC+	10	0-40
K26K-ERLVQA	13	HC+	10	20-70
K26K-ERLVQA	13	HC+	10	70-120
K26K-ERLVQA	21	HC+	10	20-50
K26K-ERLVQA	22	HC+	10	0-50
K26K-EUWQV4	1	HC+	10	0-50
K26K-EUWQV4	11	HC+	10	10-20
K26K-EUWQV4	11	HC+	10	65-95
K26K-EUWQV4	15	HC+	10	20-65
K26K-EUWQV4	15	HC+	10	75-105
K26K-EUWQV4	17	HC+	10	0-40
K26K-EUWQV4	17	HC+	10	45-70
K26K-EUWQV4	20	HC+	10	0-40
K26K-EVQJ85	17	HC+	10	0-50
K26K-EVVHM1	11	IC+	8	40-90
K26K-F4BWZA	2	IC+	8	130-180
K26K-F4BWZA	3	IC+	8	110-160
K26K-F4BWZA	6	IC+	9	0-50
K26K-F4BWZA	10	IC+	8	0-40
K26K-F4BWZA	12	IC+	8	40-90
K26K-F4BWZA	13	IC+	8	30-50
K26K-F7Z1YC	2	HC+	10	130-180
K26K-G1K1C8	11	HC+	10	25-40
K26K-G4S7NK	7	IC+	8	70-100
K26K-G7RGRH	2	IC+	8	90-140
K26K-G7RGRH	5	HC+	10	0-50
K26K-G7RGRH	8	HC+	10	0-50
K26K-G7RGRH	11	HC+	10	20-70
K26K-G7RGRH	12	IC+	8	60-100
K26K-G7RGRH	15	HC+	10	70-105
K26K-G7RGRH	18	HC+	10	20-70
K26K-G7RGRH	19	HC+	10	10-25
K26K-GGT9WV	1	HC+	10	140-180
K26K-GGT9WV	2	HC+	10	100-150
K26K-GGT9WV	5	HC+	10	90-140
K26K-GGT9WV	11	HC+	10	65-85
K26K-GGT9WV	17	HC+	10	30-80
K26K-GGT9WV	X	HC+	10	75-125
K26K-GP1DEZ	2	IC+	9	80-130
K26K-GP1DEZ	4	IC+	8	100-150
K26K-GP1DEZ	5	IC+	9	10-60
K26K-GP1DEZ	8	IC+	8	95-145
K26K-GP1DEZ	15	HC+	10	65-105
K26K-GP1DEZ	21	HC+	10	0-50
K26K-GQ6XGU	X	HC+	10	90-140
K26K-GR7U4J	11	HC+	10	80-130
K26K-GR7U4J	12	IC+	9	10-50
K26K-HGXQVM	1	HC+	10	190-240
K26K-HGXQVM	8	IC+	9	0-50
K26K-HGXQVM	17	IC+	9	10-30
K26K-HH4Q3M	21	IC+	8	35-50
K26K-HKH6GS	X	HC+	10	0-50
K26K-JF2LWZ	3	HC+	10	35-80
K26K-JF2LWZ	3	HC+	10	160-200
K26K-JF2LWZ	13	IC+	8	60-90
K26K-JF2LWZ	17	IC+	8	5-30
K26K-JF2LWZ	20	HC+	10	35-60
K26K-JF2LWZ	21	HC+	10	25-50
K26K-JG8K8P	1	HC+	10	0-50
K26K-JG8K8P	2	IC+	8	10-60
K26K-JG8K8P	2	HC+	10	160-200
K26K-JG8K8P	3	IC+	8	100-140
K26K-JG8K8P	6	HC+	10	100-150
K26K-JG8K8P	8	HC+	10	90-140
K26K-JG8K8P	10	IC+	8	0-30
K26K-JG8K8P	10	IC+	8	110-130
K26K-JG8K8P	11	IC+	8	70-120
K26K-JG8K8P	19	HC+	10	0-50
K26K-JMFZN8	1	HC+	10	190-240
K26K-JMFZN8	4	IC+	8	15-65
K26K-JMFZN8	5	HC+	10	60-80
K26K-JMFZN8	7	HC+	10	0-50
K26K-JMFZN8	20	HC+	10	15-65
K26K-KBMSKG	1	IC+	8	140-190
K26K-KBMSKG	8	HC+	10	75-125
K26K-KBMSKG	14	HC+	10	20-70
K26K-KQYMSV	19	HC+	10	05-55
K26K-LHW5P8	1	HC+	10	165-215
K26K-LKKMR2	1	HC+	10	40-60
K26K-LKKMR2	1	IC+	8	200-220
K26K-LKKMR2	3	HC+	10	110-160
K26K-LKKMR2	6	HC+	10	40-95
K26K-LKKMR2	6	HC+	10	140-180
K26K-LKKMR2	8	IC+	8	110-150
K26K-LKKMR2	11	IC+	8	70-120
K26K-LKKMR2	17	HC+	10	20-70
K26K-LKKMR2	18	IC+	8	20-60
K26K-LKKMR2	20	IC+	8	45-65
K26K-LUMBC5	11	HC+	10	30-80
K26K-LUMBC5	16	HC+	10	30-65
K26K-MNVK2W	2	HC+	10	20-70
K26K-MNVK2W	2	IC+	8	180-230
K26K-MNVK2W	5	IC+	9	0-40
K26K-MNVK2W	9	HC+	10	70-100
K26K-MNVK2W	10	HC+	10	35-85
K26K-MNVK2W	14	IC+	9	20-70
K26K-MNVK2W	20	HC+	10	0-50
K26K-N2D9XV	2	IC+	8	0-50
K26K-N2D9XV	3	HC+	10	80-130
K26K-N2D9XV	6	HC+	10	40-90
K26K-N2D9XV	8	HC+	10	90-140
K26K-N2D9XV	10	IC+	9	85-135
K26K-N2D9XV	14	IC+	8	45-70
K26K-N2D9XV	15	HC+	10	20-70
K26K-N422KN	3	HC+	10	150-200
K26K-N422KN	8	IC+	8	25-40
K26K-NDDF92	4	IC+	9	0-50
K26K-NDDF92	8	IC+	9	0-50
K26K-NDDF92	9	IC+	8	15-40
K26K-NDDF92	17	IC+	9	20-55
K26K-NKAGPR	8	HC+	10	40-85
K26K-NRBK1M	1	HC+	10	0-50
K26K-NS7PMZ	10	HC+	10	60-110
K26K-NS7PMZ	11	IC+	8	60-80
K26K-P8EEDV	11	IC+	9	0-50
K26K-PA4Z16	6	HC+	10	0-50
K26K-PA4Z16	6	IC+	8	50-100
K26K-PA4Z16	6	HC+	10	120-170
K26K-PA4Z16	8	IC+	8	20-60
K26K-PA4Z16	X	IC+	8	50-100
K26K-PAZNZP	11	HC+	10	60-80
K26K-PAZNZP	14	HC+	10	25-65
K26K-PAZNZP	17	HC+	10	50-80
K26K-PAZNZP	19	HC+	10	05-25
K26K-PCA7BN	3	IC+	8	0-40
K26K-PCA7BN	9	HC+	10	0-40
K26K-PCA7BN	11	IC+	8	60-90
K26K-PDJUSD	1	IC+	9	55-105
K26K-PDJUSD	1	HC+	10	180-230
K26K-PDJUSD	2	HC+	10	40-90
K26K-PDJUSD	2	HC+	10	95-145
K26K-PDJUSD	2	HC+	10	195-245
K26K-PDJUSD	5	HC+	10	120-170
K26K-PDJUSD	6	IC+	9	0-50
K26K-PDJUSD	6	HC+	10	100-150
K26K-PDJUSD	8	HC+	10	100-150
K26K-PDJUSD	9	HC+	10	0-30
K26K-PDJUSD	9	HC+	10	70-100
K26K-PDJUSD	12	IC+	8	100-135
K26K-PDJUSD	13	IC+	8	80-110
K26K-PDJUSD	14	IC+	9	65-110
K26K-PDJUSD	15	HC+	10	45-95
K26K-PDJUSD	16	HC+	10	20-70
K26K-PDJUSD	19	HC+	10	0-50
K26K-PDJUSD	20	IC+	8	45-60
K26K-PDJUSD	21	IC+	9	30-50
K26K-PPGH4E	1	HC+	10	90-120
K26K-PPGH4E	1	HC+	10	150-200
K26K-PPGH4E	2	HC+	10	180-220
K26K-PPGH4E	3	HC+	10	30-70
K26K-PPGH4E	3	HC+	10	120-160
K26K-PPGH4E	4	HC+	10	0-50
K26K-PPGH4E	4	IC+	8	70-120
K26K-PPGH4E	5	HC+	10	40-80
K26K-PPGH4E	6	IC+	8	0-50
K26K-PPGH4E	7	HC+	10	0-50
K26K-PPGH4E	8	HC+	10	40-90
K26K-PPGH4E	11	HC+	10	80-130
K26K-PPGH4E	12	HC+	10	50-100
K26K-PPGH4E	13	HC+	10	20-60
K26K-PPGH4E	14	HC+	10	WG
K26K-PPGH4E	15	HC+	10	40-100
K26K-PPGH4E	17	HC+	10	30-80
K26K-PV6WZJ	6	IC+	8	20-60
K26K-QA7GAW	10	HC+	10	50-90
K26K-QA7GAW	18	HC+	10	10-50
K26K-QSDNXA	1	HC+	10	140-180
K26K-R4ATRT	5	HC+	10	20-40
K26K-R4ATRT	8	HC+	10	90-135
K26K-R4ATRT	9	HC+	10	95-120
K26K-R8KRU9	7	IC+	9	0-50
K26K-R8KRU9	10	IC+	8	100-140
K26K-RWBB37	11	HC+	10	60-90
K26K-S43WPC	1	IC+	8	50-80
K26K-S43WPC	1	IC+	8	90-120
K26K-S43WPC	2	HC+	10	165-215
K26K-S43WPC	3	HC+	10	0-40
K26K-S43WPC	3	HC+	10	40-70
K26K-S43WPC	4	HC+	10	45-95
K26K-S43WPC	8	HC+	10	60-100
K26K-S43WPC	9	HC+	10	0-40
K26K-S43WPC	13	IC+	8	20-35
K26K-S43WPC	17	HC+	10	55-70
K26K-S43WPC	21	HC+	10	0-50
K26K-SAA77Y	1	HC+	10	80-120
K26K-SAA77Y	1	IC+	8	160-210
K26K-SAA77Y	2	IC+	8	160-210
K26K-SJGG4M	3	HC+	10	80-120
K26K-SJGG4M	3	IC+	8	160-180
K26K-SJGG4M	8	HC+	10	90-140
K26K-SJGG4M	12	HC+	10	50-100
K26K-SSBAF2	1	HC+	10	140-185
K26K-SSBAF2	2	IC+	8	60-110
K26K-SSBAF2	2	HC+	10	150-180
K26K-SSBAF2	4	HC+	10	60-110
K26K-SSBAF2	4	HC+	10	110-160
K26K-SSBAF2	6	IC+	8	130-170
K26K-SSBAF2	8	HC+	10	40-90
K26K-SSBAF2	11	IC+	8	30-80
K26K-SSBAF2	14	HC+	10	35-55
K26K-SSBAF2	15	HC+	10	0-999
K26K-SSBAF2	20	HC+	10	30-65
K26K-SU166F	8	HC+	10	30-70
K26K-SU166F	11	IC+	8	15-50
K26K-T6MA5Q	3	IC+	9	60-110
K26K-T6MA5Q	4	IC+	8	100-150
K26K-TG5T5N	9	HC+	10	110-135
K26K-TG5T5N	14	HC+	10	20-70
K26K-TL7317	13	HC+	10	25-75
K26K-U1QUA8	11	HC+	10	50-100
K26K-U1QUA8	17	HC+	10	0-50
K26K-U1QUA8	19	HC+	10	40-60
K26K-U1QUA8	20	IC+	9	35-65
K26K-U1QUA8	21	HC+	10	0-50
K26K-U13K48	12	IC+	8	10-50
K26K-U13K48	14	IC+	8	20-70
K26K-U48257	1	IC+	8	170-200
K26K-U48257	4	HC+	10	70-120
K26K-U48257	4	HC+	10	140-190
K26K-U48257	7	HC+	10	0-50
K26K-U48257	9	IC+	8	120-145
K26K-U48257	12	IC+	8	90-110
K26K-U48257	14	HC+	10	30-80
K26K-U48257	15	IC+	8	40-90
K26K-U48257	18	HC+	10	0-50
K26K-U48257	20	HC+	10	10-60
K26K-UVAXJ4	5	HC+	10	60-110
K26K-V2PF6M	3	HC+	10	10-55
K26K-V2PF6M	5	IC+	9	20-60
K26K-V2PF6M	11	HC+	10	55-80
K26K-V2PF6M	12	HC+	10	0-25
K26K-V2PF6M	12	HC+	10	50-100
K26K-V2PF6M	14	HC+	10	55-105
K26K-V2PF6M	17	HC+	10	30-80
K26K-V2PF6M	20	HC+	10	40-65
K26K-V2PF6M	21	IC+	8	0-50
K26K-V2PF6M	X	IC+	8	20-60
K26K-V3TLD6	3	HC+	10	100-120
K26K-V3TLD6	6	HC+	10	120-145
K26K-V3TLD6	11	HC+	10	30-80
K26K-V3TLD6	12	IC+	9	0-10
K26K-V3TLD6	19	HC+	10	30-60
K26K-VAHD5J	9	IC+	8	70-100
K26K-VAHD5J	12	IC+	8	70-115
K26K-VNY7MN	17	HC+	10	30-80
K26K-WHAFAB	15	HC+	10	50-100
K26K-WHAFAB	17	HC+	10	50-70
K26K-WPZ6MB	4	IC+	8	50-100
K26K-WPZ6MB	6	IC+	8	0-999
K26K-WPZ6MB	6	HC+	10	65-115
K26K-WPZ6MB	11	IC+	8	10-60
K26K-XAEMKV	11	HC+	10	0-50
K26K-XAEMKV	11	HC+	10	105-130
K26K-XBX9RY	2	HC+	10	20-40
K26K-XBX9RY	6	HC+	10	65-80
K26K-XBX9RY	8	HC+	10	20-70
K26K-XBX9RY	11	HC+	10	60-90
K26K-XBX9RY	12	HC+	10	60-100
K26K-XBX9RY	17	IC+	8	10-60
K26K-XBX9RY	X	HC+	10	85-155
K26K-XS277Z	3	HC+	10	0-25
K26K-XS277Z	3	IC+	9	100-145
K26K-XS277Z	7	HC+	10	05-55
K26K-XS277Z	11	HC+	10	55-80
K26K-XS277Z	17	IC+	8	25-35
K26K-XS277Z	20	HC+	10	40-65
K26K-XSB5QT	1	IC+	9	150-200
K26K-XSB5QT	8	HC+	10	10-60
K26K-XSB5QT	10	IC+	8	50-100
K26K-XSB5QT	18	HC+	10	25-75
K26K-XSB5QT	21	HC+	10	20-50
K26K-Y8ATLQ	1	IC+	8	30-80
K26K-Y8ATLQ	8	IC+	9	30-80
K26K-Y89LSN	19	HC+	10	30-60
K26K-YB2V81	8	IC+	9	50-90
K26K-YB2V81	12	HC+	10	60-80
K26K-YB2V81	12	IC+	8	95-115
K26K-YB2V81	15	HC+	10	40-70
K26K-YB2V81	19	HC+	10	0-50
K26K-YB2V81	20	HC+	10	03-65
K26K-YJB543	8	HC+	10	80-145
K26K-YJB543	17	HC+	10	40-80
K26K-YJB543	20	IC+	8	45-65
K26K-YYMX7V	1	HC+	10	155-205
K26K-YYMX7V	17	HC+	10	45-70
K26K-YYMX7V	22	HC+	10	30-50
K26K-Z8Z4HX	4	HC+	10	0-25
K26K-Z8Z4HX	15	IC+	8	50-100
K26K-Z8Z4HX	17	HC+	10	25-75
K26K-Z8Z4HX	18	HC+	10	20-50
K26K-Z559NG	1	HC+	10	170-220
K26K-Z559NG	8	HC+	10	100-150
K26K-Z559NG	11	HC+	10	0-50
K26K-Z559NG	12	HC+	10	55-85
K26K-Z559NG	14	HC+	10	20-80
K26K-ZUWXZY	11	IC+	9	90-140
