# Supplementary material for: Chromothripsis in Human Breast Cancer
Source: Oxford University Press journal article supplement (doi:10.1158/0008-5472.can-20-1920), 2020-09-24
Supplement: 00085472can201920-sup-244800_2_supp_6563062_qgn2g6.xlsx [file 00085472can201920-sup-244800_2_supp_6563062_qgn2g6.xlsx]

## Sheet: Drivers enriched
Breast cancer drivers significantly enriched in chromothriptic regions in the CATCH and in the DKFZ-HIPO17 cohort (permutation test)
		CATCH		HIPO17
Gene	Chromosome location	p corrected	p (enrichment)	p corrected	p (enrichment)
LMO2	11	0.00075	1e-05	0.278625	0.003715
EXT2	11	0.00075	1e-05	1	0.01813
CREB3L1	11	0.00075	1e-05	1	0.01789
DDB2	11	0.00075	1e-05	1	0.017625
MEN1	11	0.00075	1e-05	0.046875	0.000625
CCND1	11	0.00075	1e-05	0.045	0.0006
CTTN	11	0.00075	1e-05	0.04575	0.00061
NUMA1	11	0.00075	1e-05	0.052875	0.000705
NF1	17	0.00075	1e-05	0.00075	1e-05
SUZ12	17	0.00075	1e-05	0.00075	1e-05
LASP1	17	0.00075	1e-05	0.00075	1e-05
CDK12	17	0.00075	1e-05	0.00075	1e-05
ERBB2	17	0.00075	1e-05	0.00075	1e-05
MSI2	17	0.00075	1e-05	0.00075	1e-05
CLTC	17	0.00075	1e-05	0.00075	1e-05
BRIP1	17	0.00075	1e-05	0.00075	1e-05
CD79B	17	0.00075	1e-05	0.00075	1e-05
DDX5	17	0.00075	1e-05	0.00075	1e-05
COL1A1	17	0.000827586	1.10345e-05	0.00075	1e-05
PRKAR1A	17	0.00165517	2.2069e-05	0.00075	1e-05
RARA	17	0.00248276	3.31034e-05	0.00075	1e-05
BRCA1	17	0.0057931	7.72414e-05	0.00075	1e-05
ETV4	17	0.0057931	7.72414e-05	0.00075	1e-05
MLLT6	17	0.00827586	0.000110345	0.00075	1e-05
SNAI2	8	0.014069	0.000187586	1	0.06627
WT1	11	0.0206897	0.000275862	1	0.017815
CEBPD		0.134069	0.00178759	1	0.06641
PRKDC		0.134069	0.00178759	1	0.06641
NKX2-1		0.341793	0.00455724	1	0.79591
KTN1		0.369103	0.00492138	1	0.79647
NIN		0.384828	0.00513103	1	0.79533
GPHN		0.654621	0.00872828	1	1
NUP98		1	0.0198621	1	0.32989
SOX17		1	0.0249269	1	0.795705
ABL2		1	0.0250041	1	0.79799
CCND3		1	0.0395255	1	0.815435
LYN		1	0.0513324	1	0.79585
GATA2		1	0.0976772	1	0.79639
GLIPR1		1	0.168508	0.000375	5e-06
PBX1		1	0.168806	1	0.796445
LMO1		1	0.194483	1	0.59516
WIF1		1	0.270599	0.0015	2e-05
MDM2		1	0.270786	0.0015	2e-05
SDHC		1	0.271426	1	0.79596
FCGR2B		1	0.271426	1	0.79596
CBLB		1	0.272254	1	1
FOXL2		1	0.272783	1	0.79626
AMPH		1	0.273468	1	0.01753
FANCF		1	0.281898	1	0.01793
MAML2		1	0.335713	1	0.495215
HOXA9		1	0.401291	1	0.06677
HOXA11		1	0.401291	1	0.06677
HOXA13		1	0.401291	1	0.06677
TBK1		1	0.401953	0.0015	2e-05
MUC1		1	0.403145	1	0.79517
AVPR1A		1	0.403443	0.0015	2e-05
ETV1		1	0.46133	1	0.049975
PTPRQ		1	0.475123	0.00075	1e-05
WWTR1		1	0.549572	1	0.46124
IGFBP3		1	0.551239	1	0.017285
NTRK1		1	0.551923	1	0.795375
TPM3		1	0.552971	1	0.795615
DUSP6		1	0.554924	0.2895	0.00386
KITLG		1	0.698902	0.288375	0.003845
ARNT		1	0.699719	1	0.79656
SOCS2		1	0.702345	1	0.01766
BTG1		1	0.702488	1	0.017665
CDK4		1	0.825534	0.0075	0.0001
CYP27B1		1	0.825534	0.0075	0.0001
EGFR		1	0.912033	1	0.46241
CKAP4		1	0.965098	1	0.796105
CRY1		1	0.965153	1	0.796785
TXNRD1		1	0.965286	1	0.797055
SLC5A8		1	0.965297	1	0.795895
IGF1		1	0.965594	1	0.79658

## Sheet: CATCH_per chromosome
Chromosomes significantly enriched for chromothriptic events in the CATCH cohort
Chromosome	AUC-p corrected	AUC-p
1	1	0.99272
2	1	1
3	1	0.723143
4	1	0.997291
5	1	1
6	0.328046	0.0142629
7	1	0.999977
8	0.00023	1e-05
9	1	0.999909
10	1	0.999943
11	0.00023	1e-05
12	1	0.913349
13	1	1
14	0.336983	0.0146514
15	1	0.10952
16	1	1
17	0.00023	0
18	1	0.950926
19	0.00499429	0.000217143
20	0.00023	0
21	1	0.0692571
22	1	0.992491
X	1	1

## Sheet: HIPO17_per chromosome
Chromosomes significantly enriched for chromothriptic events in the DKFZ-HIPO17 cohort
	Chromosome	AUC-p corrected	AUC-p
HIPO17	1	1	0.9844
HIPO17	2	1	0.99261
HIPO17	3	1	0.99174
HIPO17	4	1	0.99976
HIPO17	5	1	0.99996
HIPO17	6	0.04968	0.00216
HIPO17	7	1	0.45609
HIPO17	8	1	0.19966
HIPO17	9	1	1
HIPO17	10	1	0.85052
HIPO17	11	0.00023	1e-05
HIPO17	12	0.00207	9e-05
HIPO17	13	1	0.98719
HIPO17	14	1	0.99705
HIPO17	15	1	0.32834
HIPO17	16	1	1
HIPO17	17	0.00023	1e-05
HIPO17	18	1	1
HIPO17	19	0.51428	0.02236
HIPO17	20	1	0.9579
HIPO17	21	1	1
HIPO17	22	1	0.89847
HIPO17	X	1	1
