# Supplementary material for: Chromothripsis in Human Breast Cancer
Source: Oxford University Press journal article supplement (doi:10.1158/0008-5472.can-20-1920), 2020-09-24
Supplement: 00085472can201920-sup-244800_2_supp_6563063_qgn2gp.xlsx [file 00085472can201920-sup-244800_2_supp_6563063_qgn2gp.xlsx]

## Sheet: Tabelle1
Chromosome regions with significant differences in the proportions of copy-number changes between cases with and without chromothripsis in the CATCH cohort
Chromosome	Start	End	p value	p-adj	Copy number change
20	40000000	60000000	5.85391e-07	8.89794e-05	gain
17	40000000	60000000	1.65166e-06	0.000251053	loss
17	20000000	40000000	2.17619e-06	0.000330781	loss
3	60000000	80000000	2.20264e-05	0.00334801	loss
20	20000000	40000000	6.98383e-05	0.0106154	loss
4	0	20000000	0.000104932	0.0159496	loss
20	40000000	60000000	0.000134279	0.0204104	loss
19	20000000	40000000	0.000194313	0.0295355	loss
11	60000000	80000000	0.000294432	0.0447536	gain
8	140000000	160000000	0.000465521	0.0707592	gain
8	100000000	120000000	0.000540714	0.0821885	gain
12	0	20000000	0.000644996	0.0980394	gain
20	20000000	40000000	0.000737312	0.112071	gain
23	20000000	40000000	0.000767823	0.116709	loss
8	0	20000000	0.00121723	0.185019	loss
8	120000000	140000000	0.00142949	0.217282	gain
8	40000000	60000000	0.00144453	0.219569	loss
8	20000000	40000000	0.00161767	0.245886	loss
9	0	20000000	0.00175546	0.266829	loss
3	0	20000000	0.00224036	0.340535	gain
23	40000000	60000000	0.00224036	0.340535	loss
12	100000000	120000000	0.00240474	0.36552	loss
3	40000000	60000000	0.00311115	0.472895	gain
4	20000000	40000000	0.00322446	0.490117	loss
3	20000000	40000000	0.00331837	0.504392	gain
21	20000000	40000000	0.00335071	0.509308	loss
3	80000000	100000000	0.0034665	0.526907	loss
21	40000000	60000000	0.00360096	0.547346	loss
18	40000000	60000000	0.00400483	0.608734	gain
6	120000000	140000000	0.00420481	0.639131	loss
8	80000000	100000000	0.00499911	0.759865	gain
21	0	20000000	0.00544653	0.827872	loss
17	20000000	40000000	0.0057444	0.873149	gain
11	20000000	40000000	0.00595963	0.905863	loss
17	60000000	80000000	0.00595963	0.905863	loss
18	40000000	60000000	0.00700894	1	loss
10	100000000	120000000	0.00702394	1	gain
4	180000000	200000000	0.00702394	1	loss
11	20000000	40000000	0.00772287	1	gain
11	60000000	80000000	0.00806112	1	loss
2	20000000	40000000	0.00829773	1	loss
15	40000000	60000000	0.00847055	1	gain
10	100000000	120000000	0.00847055	1	loss
6	20000000	40000000	0.00867305	1	gain
17	60000000	80000000	0.00910461	1	gain
17	0	20000000	0.0102609	1	loss
12	60000000	80000000	0.0104803	1	loss
15	40000000	60000000	0.0108189	1	loss
3	100000000	120000000	0.0112778	1	loss
6	140000000	160000000	0.011345	1	loss
2	200000000	220000000	0.0115643	1	gain
6	40000000	60000000	0.0121304	1	gain
1	80000000	100000000	0.0126816	1	loss
3	0	20000000	0.0126816	1	loss
8	40000000	60000000	0.012877	1	gain
18	60000000	80000000	0.0131777	1	gain
14	60000000	80000000	0.0137266	1	gain
19	40000000	60000000	0.013822	1	gain
21	20000000	40000000	0.013822	1	gain
3	40000000	60000000	0.013822	1	loss
19	0	20000000	0.013822	1	loss
11	120000000	140000000	0.014791	1	loss
7	0	20000000	0.0155199	1	gain
11	80000000	100000000	0.0160934	1	loss
22	20000000	40000000	0.0173029	1	gain
3	100000000	120000000	0.0177217	1	gain
9	20000000	40000000	0.0180607	1	gain
6	20000000	40000000	0.0180607	1	loss
18	60000000	80000000	0.0183699	1	loss
9	20000000	40000000	0.0200651	1	loss
15	60000000	80000000	0.0202389	1	gain
7	20000000	40000000	0.0207738	1	gain
19	20000000	40000000	0.0211093	1	gain
14	100000000	120000000	0.0216728	1	gain
8	80000000	100000000	0.022103	1	loss
20	0	20000000	0.0225236	1	gain
10	60000000	80000000	0.0225449	1	loss
7	80000000	100000000	0.0227287	1	loss
10	0	20000000	0.0242565	1	gain
3	180000000	200000000	0.0256782	1	gain
6	100000000	120000000	0.0258544	1	loss
2	200000000	220000000	0.0269783	1	loss
12	20000000	40000000	0.0269783	1	loss
15	60000000	80000000	0.0269783	1	loss
17	40000000	60000000	0.0273532	1	gain
20	60000000	80000000	0.030712	1	loss
10	60000000	80000000	0.0314369	1	gain
4	40000000	60000000	0.0314369	1	loss
9	140000000	160000000	0.0315465	1	loss
21	40000000	60000000	0.0322941	1	gain
10	80000000	100000000	0.0333792	1	gain
11	0	20000000	0.0333792	1	gain
1	80000000	100000000	0.0345374	1	gain
1	140000000	160000000	0.0345374	1	loss
2	220000000	240000000	0.0347374	1	gain
3	160000000	180000000	0.0347374	1	loss
1	100000000	120000000	0.0358212	1	gain
1	100000000	120000000	0.0358212	1	loss
10	80000000	100000000	0.0387997	1	loss
23	140000000	160000000	0.0387997	1	loss
8	140000000	160000000	0.0388332	1	loss
23	120000000	140000000	0.0400381	1	loss
5	120000000	140000000	0.0426184	1	loss
2	240000000	260000000	0.0428417	1	gain
8	20000000	40000000	0.0428821	1	gain
1	40000000	60000000	0.0439993	1	loss
11	40000000	60000000	0.0443763	1	gain
20	60000000	80000000	0.0443763	1	gain
6	100000000	120000000	0.0475855	1	gain
3	20000000	40000000	0.0475855	1	loss
13	100000000	120000000	0.0476204	1	loss
1	60000000	80000000	0.0501982	1	gain
14	40000000	60000000	0.0501982	1	gain
4	160000000	180000000	0.0520276	1	loss
9	60000000	80000000	0.0520276	1	loss
1	40000000	60000000	0.0540133	1	gain
12	0	20000000	0.0540133	1	loss
3	120000000	140000000	0.0541439	1	gain
16	80000000	100000000	0.0543652	1	gain
11	100000000	120000000	0.0556154	1	loss
5	180000000	200000000	0.0557363	1	gain
6	120000000	140000000	0.0580012	1	gain
17	0	20000000	0.0580012	1	gain
2	220000000	240000000	0.0580012	1	loss
3	80000000	100000000	0.0586352	1	gain
7	80000000	100000000	0.0602282	1	gain
15	0	20000000	0.0614033	1	loss
12	40000000	60000000	0.0626663	1	gain
10	0	20000000	0.0628544	1	loss
1	0	20000000	0.0632024	1	gain
2	60000000	80000000	0.0656742	1	gain
18	0	20000000	0.0656742	1	gain
6	160000000	180000000	0.0656742	1	loss
14	40000000	60000000	0.0656742	1	loss
10	20000000	40000000	0.0661497	1	gain
14	80000000	100000000	0.0702694	1	gain
9	80000000	100000000	0.0702694	1	loss
3	140000000	160000000	0.0716263	1	gain
4	60000000	80000000	0.073778	1	gain
6	80000000	100000000	0.073778	1	loss
10	120000000	140000000	0.0759295	1	gain
4	60000000	80000000	0.0759295	1	loss
12	120000000	140000000	0.0764047	1	loss
6	0	20000000	0.0766247	1	gain
11	80000000	100000000	0.0801849	1	gain
2	160000000	180000000	0.0846275	1	gain
6	140000000	160000000	0.0881356	1	gain
12	80000000	100000000	0.0886965	1	loss
3	60000000	80000000	0.0902516	1	gain
9	0	20000000	0.0912497	1	gain
1	160000000	180000000	0.0912497	1	loss
2	160000000	180000000	0.0912497	1	loss
1	20000000	40000000	0.095262	1	gain
2	100000000	120000000	0.095262	1	gain
9	100000000	120000000	0.095262	1	loss
10	120000000	140000000	0.095262	1	loss
8	100000000	120000000	0.101325	1	loss
13	80000000	100000000	0.106049	1	gain
22	40000000	60000000	0.106049	1	gain
2	60000000	80000000	0.106049	1	loss
11	100000000	120000000	0.109099	1	gain
3	140000000	160000000	0.109099	1	loss
3	160000000	180000000	0.118502	1	gain
14	80000000	100000000	0.120621	1	loss
15	100000000	120000000	0.12427	1	loss
12	120000000	140000000	0.125628	1	gain
15	80000000	100000000	0.125628	1	gain
23	0	20000000	0.126111	1	gain
15	80000000	100000000	0.126111	1	loss
2	240000000	260000000	0.131151	1	loss
8	60000000	80000000	0.131151	1	loss
22	20000000	40000000	0.136649	1	loss
8	60000000	80000000	0.138413	1	gain
5	20000000	40000000	0.141545	1	gain
13	40000000	60000000	0.141545	1	loss
2	180000000	200000000	0.14278	1	gain
4	100000000	120000000	0.14278	1	loss
12	20000000	40000000	0.148803	1	gain
14	100000000	120000000	0.149168	1	loss
4	80000000	100000000	0.153598	1	gain
3	120000000	140000000	0.153598	1	loss
7	0	20000000	0.153598	1	loss
9	120000000	140000000	0.158228	1	loss
4	40000000	60000000	0.15898	1	gain
7	40000000	60000000	0.160582	1	gain
2	80000000	100000000	0.161754	1	gain
12	80000000	100000000	0.161754	1	gain
1	60000000	80000000	0.161754	1	loss
23	100000000	120000000	0.161754	1	loss
11	120000000	140000000	0.180879	1	gain
1	220000000	240000000	0.180879	1	loss
9	120000000	140000000	0.189628	1	gain
19	0	20000000	0.189628	1	gain
22	0	20000000	0.196743	1	loss
13	60000000	80000000	0.197296	1	loss
17	80000000	100000000	0.198505	1	loss
16	60000000	80000000	0.207594	1	loss
9	140000000	160000000	0.211941	1	gain
22	0	20000000	0.211941	1	gain
16	20000000	40000000	0.217226	1	loss
12	60000000	80000000	0.217541	1	gain
12	100000000	120000000	0.220914	1	gain
2	140000000	160000000	0.229056	1	gain
13	100000000	120000000	0.229056	1	gain
13	0	20000000	0.229056	1	loss
1	20000000	40000000	0.230351	1	loss
13	80000000	100000000	0.230351	1	loss
2	0	20000000	0.247098	1	loss
23	40000000	60000000	0.255784	1	gain
10	20000000	40000000	0.265237	1	loss
4	140000000	160000000	0.277015	1	gain
16	80000000	100000000	0.277724	1	loss
6	40000000	60000000	0.290172	1	loss
1	200000000	220000000	0.291535	1	gain
6	80000000	100000000	0.305489	1	gain
9	100000000	120000000	0.305489	1	gain
7	20000000	40000000	0.305489	1	loss
23	20000000	40000000	0.319197	1	gain
7	40000000	60000000	0.330873	1	loss
2	100000000	120000000	0.332598	1	loss
5	0	20000000	0.337693	1	gain
21	0	20000000	0.337693	1	gain
1	140000000	160000000	0.353297	1	gain
1	160000000	180000000	0.353297	1	gain
20	0	20000000	0.358435	1	loss
14	60000000	80000000	0.358596	1	loss
15	100000000	120000000	0.365906	1	gain
15	0	20000000	0.36727	1	gain
5	160000000	180000000	0.376467	1	gain
5	100000000	120000000	0.379152	1	loss
1	200000000	220000000	0.38	1	loss
2	40000000	60000000	0.383098	1	gain
11	0	20000000	0.383098	1	loss
2	140000000	160000000	0.39883	1	loss
5	40000000	60000000	0.399456	1	loss
14	0	20000000	0.39989	1	loss
4	80000000	100000000	0.406871	1	loss
7	120000000	140000000	0.406871	1	loss
12	40000000	60000000	0.406871	1	loss
5	100000000	120000000	0.417285	1	gain
17	80000000	100000000	0.433287	1	gain
7	140000000	160000000	0.433287	1	loss
2	40000000	60000000	0.434216	1	loss
9	80000000	100000000	0.452109	1	gain
2	0	20000000	0.459316	1	gain
4	20000000	40000000	0.473421	1	gain
4	120000000	140000000	0.473421	1	loss
9	60000000	80000000	0.477191	1	gain
2	20000000	40000000	0.482759	1	gain
23	0	20000000	0.482759	1	loss
2	120000000	140000000	0.484816	1	gain
1	180000000	200000000	0.492795	1	gain
7	140000000	160000000	0.506066	1	gain
4	100000000	120000000	0.509817	1	gain
5	40000000	60000000	0.511502	1	gain
5	120000000	140000000	0.514059	1	gain
4	120000000	140000000	0.534326	1	gain
16	60000000	80000000	0.575925	1	gain
7	100000000	120000000	0.599995	1	gain
4	0	20000000	0.606875	1	gain
8	120000000	140000000	0.606875	1	loss
23	100000000	120000000	0.632926	1	gain
4	140000000	160000000	0.670919	1	loss
5	60000000	80000000	0.670919	1	loss
4	160000000	180000000	0.703021	1	gain
6	0	20000000	0.706947	1	loss
3	180000000	200000000	0.708379	1	loss
23	140000000	160000000	0.710482	1	gain
7	120000000	140000000	0.71652	1	gain
1	220000000	240000000	0.730119	1	gain
5	80000000	100000000	0.743873	1	gain
4	180000000	200000000	0.750069	1	gain
8	0	20000000	0.813109	1	gain
1	180000000	200000000	0.817163	1	loss
5	160000000	180000000	0.822714	1	loss
6	160000000	180000000	0.8499	1	gain
1	240000000	260000000	0.864877	1	loss
23	80000000	100000000	0.893044	1	gain
1	240000000	260000000	0.924752	1	gain
14	0	20000000	0.938905	1	gain
5	180000000	200000000	0.944887	1	loss
5	20000000	40000000	0.970964	1	loss
16	20000000	40000000	0.979436	1	gain
5	80000000	100000000	0.983755	1	loss
5	60000000	80000000	0.998869	1	gain
2	180000000	200000000	0.998869	1	loss
5	0	20000000	0.998869	1	loss
5	140000000	160000000	1	1	gain
13	40000000	60000000	1	1	gain
13	60000000	80000000	1	1	gain
16	0	20000000	1	1	gain
23	120000000	140000000	1	1	gain
16	0	20000000	1	1	loss
13	0	20000000	1	1	gain
1	0	20000000	1	1	loss
5	140000000	160000000	1	1	loss
7	100000000	120000000	1	1	loss
22	40000000	60000000	1	1	loss
2	80000000	100000000	NaN	#VALUE!	loss
2	120000000	140000000	NaN	#VALUE!	loss
11	40000000	60000000	NaN	#VALUE!	loss
18	0	20000000	NaN	#VALUE!	loss
19	40000000	60000000	NaN	#VALUE!	loss
23	80000000	100000000	NaN	#VALUE!	loss
