# Supplementary material for: Chromothripsis in Human Breast Cancer
Source: Oxford University Press journal article supplement (doi:10.1158/0008-5472.can-20-1920), 2020-09-24
Supplement: 00085472can201920-sup-244800_2_supp_6563064_qgn2g2.xlsx [file 00085472can201920-sup-244800_2_supp_6563064_qgn2g2.xlsx]

## Sheet: Sheet1
Regression analysis on the number of fusion genes depending on the number of structural variants
1. For tumors with chromothripsis (high-confidence)
	Estimate	Std error	t value	p-value
Intercept	-0.247108	5.318285	-0.046	0.963
SV count	0.075476	0.007175	10.519	<2e-16 ***
2. For tumours without chromothripsis
	Estimate	Std error	t value	p-value
Intercept	2.514174	3.562580	0.706	0.495038
SV count	0.045481	0.009275	4.903	0.000469 ***
Recurrent fusion partner	Number of recurrences of this fusion in the CATCH cohort (supported by whole genome sequencing data)	Number of chromothripsis positive cases with this fusion (from total recurrent ones in column B)	Number of cases with fusion in frame (from total number of chromothripsis cases in column C)	Fusion partners of the recurrently fused genes
ESR1	7	1	0	AKAP12,C6orf211,CCDC170,PAIP1,RP11-690J15.1
PPFIA1	5	4	0	B4GALT1,FADD,KIAA1549L,NARS2,RP11-353N4.4,RP11-739N10.1
TANC2	5	3	1	CEP112,CYSLTR1,FAM19A2,MRC2,ZFPM2
ADAM9	5	1	0	ME3,NLK,SYNM,WFS1,ZMAT4
HBS1L	5	1	0	AHI1,CEP85L,IL20RA
FCHSD2	4	4	1	ARHGEF17,FAM168A,MAP6,MYEOV,TPK1,VCP
BCAS3	4	3	1	AC111155.1,APPBP2,BRIP1,MAP3K3,PLEKHM1P
MAP3K3	4	3	2	B4GALT5,DHX40,PRKCA
SPAG9	4	3	2	ASIC2,PPP1R1B,RP11-120I21.2,SLC35B1,THUMPD3
TRIM37	4	3	1	AC003051.1,CA1,LINC00511,RFFL
CHD6	4	2	0	CHD6,DLG2,PTPRT
FRS2	4	2	0	ACSS3,CNOT2,NUDT14(7554),BRF1(20409),RN7SL804P(5962),RP11-159A18.1(15496),RP11-314D7.2(109490),RP11-166B14.1(330859),RP11-611E13.2,RP11-956E11.1
LDLRAD3	4	1	1	CD44,CELSR2,RCN1,TRIM44
NF1	4	1	0	ANKRD13B,EYS,FAM188A,hsa-mir-6080,RP11-848P1.9
SEPT9	4	1	0	EXOC7,GRB2,SEC14L1,SEPT9,ZFP36L1
SHANK2	4	1	1	ANO1,NUMA1,QSER1,RNF169,RP11-849H4.4
ETV6	4	0	0	BCL2L14,ETV6(23324),BCL2L14(131118),ETV6(47431),BCL2L14(107011),LRP6,OAZ2
LPP	4	0	0	RNLS,SPTLC3,TPRG1,VPS8
RABEP1	4	0	0	RABEP1,RP11-333E1.1,TM4SF5
FBXL20	3	3	0	ARSG,FBXL20,LDB2,MYH7
PAK1	3	3	0	AP002387.1,CHKA,DHCR7,MAP6
PHF20	3	3	1	IGF1R,SOGA1,STK4
PRKCA	3	3	2	ACSF2,MARCH10,PITPNC1
RSF1	3	3	1	ANO1,MGAT4C,NUMA1,RP11-202H2.1,RP11-805J14.3
TLK2	3	3	1	LINC00511,MARCH10,PCTP,SLMO2P3(33553),RP11-180P8.1(60204)
ACACA	3	2	0	ASIC2,CA10,CDK12
ANO1	3	2	0	C11orf80,CTD-2591A6.2,SHANK2
ATF6	3	2	0	ATF6,FLAD1,LRP1B,RP11-544M22.1,SPTA1
FGGY	3	2	0	COL8A1,DAB1,OMA1
INTS4	3	2	1	ALG8,GAB2,RP11-452H21.1,RP11-91P24.7
MED13	3	2	1	BRIP1,LRRC37A16P,TRPM3
PREX1	3	2	1	GGT7,PCSK1N,RBM27
RFWD2	3	2	1	RNY5P5(10586),AL590084.1(177),RP1-10C16.1,RP4-798P15.3,SEC16B
RP11-180P8.1	3	2	0	CCDC47,CSH2,FAM19A2,GH1,MRPS23
TRPS1	3	2	0	AGO2,LINC00536,RP11-192P9.1(569261),TRPS1(47305)
AKAP13	3	1	0	DNAH17,KLHL25,VMP1
CD44	3	1	0	JMJD1C,PAMR1,PDHX
CTTN	3	1	0	PAK1,PPFIA1,RBM14-RBM4,RBM4
INTS6	3	1	0	LECT1,RP11-307N16.6,SPATA13,WDFY2
NDUFS4	3	1	1	ENDOD1,ITGA2,NDUFS4
PHF21A	3	1	0	AMBRA1,CADM2,CTD-2655K5.1
RAPGEF5	3	1	0	SEPT14,STEAP1B
RPH3AL	3	1	0	GINS3,RP11-481J2.2,VPS53
ZNF384	3	1	0	ACRBP,AL590558.1(97112),RP11-184C23.1(112790),LEPREL2
AHI1	3	0	0	CTA-212D2.2,HBS1L
CREBBP	3	0	0	ADCY9,AR,CREBBP
NFIX	3	0	0	CALR,FARP2,GCDH,RAD23A
NOTCH1	3	0	0	RP11-251M1.1,SEC16A,WNT10A
PLEC	3	0	0	CACNB2,MROH1,PARP10,SFRP1
PTEN	3	0	0	FAS,LPP,MED6P1(82430),RNLS(141611)
PVT1	3	0	0	CASC8,CASC8(108567),CASC11(95637),FAF1,POU5F1B,RP11-382A18.2
SRCAP	3	0	0	AC002310.7,AUTS2,ZNF785
TC2N	3	0	0	AC074391.1,FBLN5,NDUFB1,TRIP11
AAMDC	2	2	1	GAB2,INTS4
ABHD2	2	2	0	LINC00924,POLG
ACSS2	2	2	0	C19orf18,EPDR1,GPR141
APPBP2	2	2	2	BCAS3,MED24
BPTF	2	2	0	KIAA1109,MAP2K6
CCDC47	2	2	0	GH1,SLC39A11
CCSER1	2	2	0	BPTF,RP11-813N20.1,UGT2A3
CERKL	2	2	1	ERBB4,PDE1A
CUEDC1	2	2	0	BCAS3,TEX2
DDX42	2	2	1	APOH,VMP1
ERN1	2	2	0	TACO1,TPD52
GAB2	2	2	0	FRMD6-AS2,PRKD1,USP35
INTS2	2	2	0	BRIP1,RP11-112H10.4
ITGB5	2	2	1	HEG1,MUC13
KDM2A	2	2	1	AC006460.2,NAB1,NUCB2
LINC00674	2	2	0	TLK2,VMP1
LSR	2	2	0	CHST8,HPN-AS1
MYO5C	2	2	0	CTD-2034I4.1,SLC30A7
NPAS3	2	2	1	EGLN3,PSMD11
OMA1	2	2	0	FGGY
PTRH2	2	2	0	CLTC,LRRC37A16P
RALGAPA1	2	2	1	PPP2R3C,TTLL1
SERGEF	2	2	0	NAV2,SAAL1
SPOP	2	2	1	CTD-2535P7.2(11190),AC090079.1(86602),TK1
SRGAP3	2	2	0	LMCD1,SETD5-AS1
TAX1BP1	2	2	0	BBS9,VOPP1
TOM1L1	2	2	0	RP11-588H23.3,SKAP1
TRPM7	2	2	0	AC092155.1(7982),PSAT1P2(11422),CTD-2034I4.1,CTD-2034I4.2
TSEN15	2	2	0	FAM20B,NFASC
